# Supplementary material for: Coupled Carbon, Sulfur, and Nitrogen Cycles Mediated by Microorganisms in the Water Column of a Shallow-Water Hydrothermal Ecosystem
Source: Front Microbiol. 2018 Nov 13;9:2718. doi: 10.3389/fmicb.2018.02718 (PMC6282030; doi:10.3389/fmicb.2018.02718)
Supplement: Supplementary file 2 [file Data_Sheet_2.XLSX]

## Sheet: Metabolism pathways（Figure 2-4）
Detected sequences for genes related to carbon fixation, and sulfur and nitrogen metabolism in metatranscriptomes
Pathway	Function	EC number（KEGG）	Accession number（NCBI）	Sequence ID	Species	SW		BW
						raw reads	% of total mapped reads	raw reads	% of total mapped reads
CBB Cycle	glyceraldehyde-3-phosphate dehydrogenase	1.2.1.12	CAC81002.1	Unigene19009_merge	Stanieria cyanosphaera PCC 7437	0	0	58	0.000302
		1.2.1.13	ABM76784.1	Unigene6001_merge	Prochlorococcus marinus str. MIT 9303	8	3.63e-05	452	0.002352
			WP_067093418.1	Unigene10415_merge	Synechococcus sp. MIT S9508	0	0	4	2.08e-05
		1.2.1.-	EEZ79877.1	Unigene20793_merge	uncultured SUP05 cluster bacterium	1	4.54e-06	11	5.72e-05
			WP_006851641.1	Unigene17888_merge	Synechococcus sp. WH 8109	0	0	8	4.16e-05
				Unigene6105_merge	Synechococcus sp. WH 8109	1	4.54e-06	40	0.000208
	transketolase	2.2.1.1	OUX73819.1	CL1056.Contig2_merge	Synechococcus sp. TMED90	1	4.54e-06	4	2.08e-05
			PIE00161.1	Unigene14244_merge	Thiothrix nivea	1	4.54e-06	9	4.68e-05
			WP_006850509.1	Unigene20132_merge	Synechococcus sp. WH 8109	2	9.08e-06	19	9.89e-05
				Unigene6625_merge	Synechococcus sp. WH 8109	3	1.36e-05	16	8.33e-05
			WP_020557941.1	Unigene14585_merge	Thiothrix flexilis	0	0	12	6.25e-05
			WP_028488273.1	CL2532.Contig1_merge	Thiothrix lacustris	0	0	3	1.56e-05
			WP_029406675.1	CL1116.Contig3_merge	Thiomicrorhabdus sp. Milos-T2	23236	0.105529	5388	0.028041
				Unigene11154_merge	Thiomicrorhabdus sp. Milos-T2	0	0	2	1.04e-05
				Unigene531_merge	Thiomicrorhabdus sp. Milos-T2	240	0.00109	249	0.001296
			WP_038551702.1	CL1056.Contig1_merge	Synechococcus sp. KORDI-52	5	2.27e-05	83	0.000432
			WP_002709014.1	CL1373.Contig1_merge	Thiothrix nivea	2	9.08e-06	7	3.64e-05
				CL2532.Contig2_merge	Thiothrix nivea	18	8.17e-05	65	0.000338
				CL1373.Contig2_merge	Thiothrix nivea	9	4.09e-05	50	0.00026
			WP_006459648.1	Unigene5703_merge	Thiomicrospira aerophila	2	9.08e-06	4	2.08e-05
			WP_040726570.1	Unigene5706_merge	Thiomicrorhabdus sp. Kp2	0	0	3	1.56e-05
	phosphoribulokinase	2.7.1.19	OIP94508.1	Unigene22537_merge	Thiomicrospira sp. CG2_30_44_34	2	9.08e-06	6	3.12e-05
			OUT84652.1	CL939.Contig2_merge	Synechococcus sp. TMED20	3	1.36e-05	8	4.16e-05
			WP_011364294.1	Unigene7387_merge	Synechococcus sp. CC9605	0	0	7	3.64e-05
			WP_011364816.1	Unigene20114_merge	Synechococcus sp. CC9605	5	2.27e-05	388	0.002019
			WP_018078208.1	CL939.Contig1_merge	Thiobacillus denitrificans	16	7.27e-05	38	0.000198
			WP_090252191.1	Unigene31476_merge	Ectothiorhodospira marina	2	9.08e-06	1	5.2e-06
	phosphoglycerate kinase	2.7.2.3	WP_015162225.1	Unigene23736_merge	Chamaesiphon minutus	0	0	5	2.6e-05
			WP_015198799.1	Unigene16534_merge	Calothrix parietina	1	4.54e-06	14	7.29e-05
			WP_019625093.1	Unigene3950_merge	Thioalkalivibrio sp. ALJT	7	3.18e-05	8	4.16e-05
			WP_015110302.1	Unigene13304_merge	Cyanobium gracile	0	0	2	1.04e-05
			WP_038552523.1	Unigene6624_merge	Synechococcus sp. KORDI-52	3	1.36e-05	481	0.002503
			WP_103921681.1	Unigene14480_merge	Thiotrichales bacterium HS_08	2	9.08e-06	6	3.12e-05
	fructose-1,6-bisphosphatase	3.1.3.11	OQX10305.1	Unigene4075_merge	Thiothrix lacustris	8	3.63e-05	18	9.37e-05
			WP_002709116.1	Unigene2311_merge	Thiothrix nivea	21	9.54e-05	43	0.000224
				Unigene26979_merge	Thiothrix nivea	1	4.54e-06	0	0
			WP_006851350.1	Unigene6484_merge	Synechococcus sp. WH 8109	11	5e-05	754	0.003924
	ribulose-1,5-bisphosphate carboxylase/oxygenase	4.1.1.39	WP_024851801.1	Unigene29258_merge	Hydrogenovibrio kuenenii	4	1.82e-05	0	0
			WP_029912625.1	Unigene4871_merge	Hydrogenovibrio marinus	4	1.82e-05	7	3.64e-05
			WP_012195105.1	Unigene14874_merge	Prochlorococcus marinus	0	0	9	4.68e-05
			WP_068585393.1	Unigene27104_merge	Thiomicrospira sp. WB1	4	1.82e-05	1	5.2e-06
			BAD15312.1	CL655.Contig6_merge	Hydrogenovibrio marinus	0	0	8	4.16e-05
				Unigene4501_merge	Hydrogenovibrio marinus	4	1.82e-05	15	7.81e-05
				CL655.Contig3_merge	Hydrogenovibrio marinus	61	0.000277	228	0.001187
			BAD15313.1	Unigene1660_merge	Hydrogenovibrio marinus	32	0.000145	33	0.000172
				Unigene27339_merge	Hydrogenovibrio marinus	4	1.82e-05	1	5.2e-06
			BAD15326.1	Unigene30066_merge	Hydrogenovibrio marinus	41	0.000186	4	2.08e-05
			EIJ34450.1	CL35.Contig2_merge	Thiothrix nivea DSM 5205	1	4.54e-06	7	3.64e-05
				CL35.Contig3_merge	Thiothrix nivea DSM 5205	0	0	17	8.85e-05
				Unigene18012_merge	Thiothrix nivea DSM 5205	1	4.54e-06	0	0
				Unigene20439_merge	Thiothrix nivea DSM 5205	0	0	12	6.25e-05
				Unigene5406_merge	Thiothrix nivea DSM 5205	0	0	28	0.000146
			OUW40316.1	Unigene13386_merge	Synechococcus sp. TMED185	0	0	2	1.04e-05
			WP_002708379.1	Unigene14351_merge	Thiothrix nivea	2	9.08e-06	31	0.000161
				Unigene5935_merge	Thiothrix nivea	4	1.82e-05	35	0.000182
			WP_007101969.1	Unigene3584_merge	Synechococcus sp. RS9917	185	0.00084	3534	0.018392
			WP_011370261.1	CL655.Contig1_merge	Thiomicrospira crunogena	2490177	11.3094	763421	3.97309
				Unigene178_merge	Thiomicrospira crunogena	4	1.82e-05	14	7.29e-05
				Unigene4231_merge	Thiomicrospira crunogena	40	0.000182	95	0.000494
			WP_011370262.1	Unigene472_merge	Thiomicrospira crunogena	20	9.08e-05	71	0.00037
			WP_029933650.1	Unigene28596_merge	Thiomicrospira pelophila	3	1.36e-05	0	0
			WP_032523685.1	Unigene15477_merge	Prochlorococcus marinus	2	9.08e-06	16	8.33e-05
			WP_040839336.1	Unigene3388_merge	Thiothrix nivea	9	4.09e-05	30	0.000156
			WP_068650386.1	CL655.Contig4_merge	Thiomicrospira sp. XS5	6	2.72e-05	4	2.08e-05
			WP_093066204.1	Unigene5783_merge	Thiothrix caldifontis	0	0	4	2.08e-05
	fructose-1,6-bisphosphate aldolase	4.1.2.13	WP_028487319.1	Unigene5704_merge	Thiomicrorhabdus chilensis	0	0	3	1.56e-05
			EDN71671.1	Unigene27211_merge	Beggiatoa sp. SS	5	2.27e-05	0	0
			EEZ79872.1	Unigene881_merge	uncultured SUP05 cluster bacterium	10	4.54e-05	20	0.000104
			WP_011364811.1	Unigene2988_merge	Synechococcus sp. CC9605	20	9.08e-05	787	0.004096
			WP_018863635.1	CL1116.Contig2_merge	Thioalkalivibrio sp. ARh3	20	9.08e-05	51	0.000265
			WP_018953754.1	CL1116.Contig1_merge	Thioalkalivibrio sulfidiphilus	13	5.9e-05	12	6.25e-05
			WP_025282664.1	Unigene30623_merge	Ectothiorhodospira haloalkaliphila	1	4.54e-06	0	0
			WP_108273595.1	Unigene26436_merge	gamma proteobacterium symbiont of Ctena orbiculata	1	4.54e-06	3	1.56e-05
	ribose-5-phosphate isomerase B	5.3.1.6	WP_011365020.1	Unigene19660_merge	Synechococcus sp. CC9605	5	2.27e-05	126	0.000656
rTCA Cycle	malate dehydrogenase	1.1.1.37	PHR14572.1	Unigene23983_merge	Sulfurimonas sp.	0	0	5	2.6e-05
			OHD83943.1	Unigene7660_merge	Sulfuricurvum sp. RIFCSPHIGHO2_02_FULL_43_9	0	0	4	2.08e-05
			PHS36922.1	CL1831.Contig2_merge	Sulfurimonas sp.	8	3.63e-05	38	0.000198
				CL1831.Contig1_merge	Sulfurimonas sp.	0	0	9	4.68e-05
			WP_011980265.1	CL285.Contig3_merge	Sulfurovum sp. NBC37-1	3	1.36e-05	10	5.2e-05
				CL285.Contig2_merge	Sulfurovum sp. NBC37-1	8	3.63e-05	12	6.25e-05
				CL285.Contig1_merge	Sulfurovum sp. NBC37-1	0	0	12	6.25e-05
			WP_067330660.1	CL2422.Contig3_merge	Sulfurovum riftiae	18	8.17e-05	70	0.000364
				CL2422.Contig2_merge	Sulfurovum riftiae	7	3.18e-05	57	0.000297
				CL2422.Contig1_merge	Sulfurovum riftiae	1	4.54e-06	9	4.68e-05
				Unigene330_merge	Lebetimonas natsushimae	1590	0.007221	1607	0.008363
	isocitrate dehydrogenase	1.1.1.42	KIM06144.1	Unigene13495_merge	Sulfurovum sp. FS06-10	1	4.54e-06	13	6.77e-05
			PHQ55451.1	Unigene3076_merge	Sulfurimonas sp.	10	4.54e-05	53	0.000276
			WP_011980263.1	Unigene28898_merge	Sulfurovum sp. NBC37-1	4	1.82e-05	4	2.08e-05
			WP_021286361.1	CL2917.Contig5_merge	Sulfurimonas hongkongensis	1	4.54e-06	5	2.6e-05
			KIM06794.1	CL2112.Contig4_merge	Sulfurovum sp. FS08-3	2	9.08e-06	2	1.04e-05
			OHD95333.1	CL2112.Contig2_merge	Sulfurimonas sp. GWF2_37_8	11	5e-05	20	0.000104
			OYY27798.1	Unigene1248_merge	Sulfurovum sp. 35-42-20	6	2.72e-05	10	5.2e-05
			OYZ47374.1	CL2917.Contig8_merge	Sulfurovum sp. 24-42-9	4	1.82e-05	35	0.000182
				CL250.Contig2_merge	Sulfurovum sp. 24-42-9	0	0	4	2.08e-05
				CL250.Contig1_merge	Sulfurovum sp. 24-42-9	1	4.54e-06	31	0.000161
				Unigene5794_merge	Sulfurovum sp. 24-42-9	10	4.54e-05	72	0.000375
				CL2917.Contig7_merge	Sulfurovum sp. 24-42-9	14	6.36e-05	8	4.16e-05
			OZA02738.1	CL767.Contig2_merge	Sulfuricurvum sp. 17-40-25	0	0	2	1.04e-05
			PHM17356.1	Unigene5684_merge	Sulfuricurvum sp. PD_MW2	0	0	2	1.04e-05
				Unigene1114_merge	Sulfuricurvum sp. PD_MW2	23	0.000104	10	5.2e-05
				CL2444.Contig2_merge	Sulfuricurvum sp. PD_MW2	31	0.000141	46	0.000239
				Unigene3149_merge	Sulfuricurvum sp. PD_MW2	63	0.000286	49	0.000255
				Unigene13646_merge	Sulfuricurvum sp. PD_MW2	1	4.54e-06	2	1.04e-05
			PHQ55451.1	Unigene15852_merge	Sulfurimonas sp.	0	0	13	6.77e-05
			PHS36909.1	CL2112.Contig1_merge	Sulfurovum sp.	0	0	32	0.000167
			WP_008241708.1	Unigene5793_merge	Sulfurovum sp. AR	0	0	18	9.37e-05
				Unigene5424_merge	Sulfurovum sp. AR	1	4.54e-06	14	7.29e-05
				CL2917.Contig6_merge	Sulfurovum sp. AR	2	9.08e-06	16	8.33e-05
			WP_008242259.1	Unigene5723_merge	Sulfurovum sp. AR	1	4.54e-06	8	4.16e-05
				CL2917.Contig4_merge	Sulfurovum sp. AR	0	0	12	6.25e-05
				CL2917.Contig3_merge	Sulfurovum sp. AR	1	4.54e-06	32	0.000167
				CL2917.Contig2_merge	Sulfurovum sp. AR	0	0	9	4.68e-05
				CL2917.Contig14_merge	Sulfurovum sp. AR	7	3.18e-05	13	6.77e-05
				CL2917.Contig13_merge	Sulfurovum sp. AR	0	0	10	5.2e-05
				CL2917.Contig12_merge	Sulfurovum sp. AR	0	0	0	0
				CL2917.Contig11_merge	Sulfurovum sp. AR	0	0	22	0.000114
				CL2917.Contig10_merge	Sulfurovum sp. AR	25	0.000114	439	0.002285
				CL2112.Contig3_merge	Sulfurovum sp. AR	33	0.00015	235	0.001223
			WP_011980263.1	CL2917.Contig1_merge	Sulfurovum sp. NBC37-1	0	0	7	3.64e-05
			WP_013326917.1	Unigene2926_merge	Sulfurimonas autotrophica	10	4.54e-05	13	6.77e-05
				Unigene27456_merge	Sulfurimonas autotrophica	10	4.54e-05	12	6.25e-05
				CL2917.Contig9_merge	Sulfurimonas autotrophica	13	5.9e-05	85	0.000442
			WP_021286361.1	Unigene19640_merge	Sulfurimonas hongkongensis	3	1.36e-05	46	0.000239
			WP_046551463.1	Unigene3230_merge	Sulfurovum lithotrophicum	12	5.45e-05	19	9.89e-05
				Unigene1756_merge	Sulfurovum lithotrophicum	4	1.82e-05	5	2.6e-05
				CL2917.Contig15_merge	Sulfurovum lithotrophicum	4	1.82e-05	11	5.72e-05
			WP_067330658.1	CL2444.Contig1_merge	Sulfurovum riftiae	1	4.54e-06	4	2.08e-05
			WP_096258463.1	CL764.Contig8_merge	Lebetimonas natsushimae	3955	0.017962	1921	0.009998
	pyruvate:ferredoxin oxidoreductase	1.2.7.1	DAB39751.1	Unigene5713_merge	Sulfurovum sp. UBA12169	2	9.08e-06	25	0.00013
			OYY30353.1	Unigene30201_merge	Sulfurovum sp. 35-42-20	3	1.36e-05	110	0.000572
				Unigene1746_merge	Sulfurovum sp. 35-42-20	8	3.63e-05	5	2.6e-05
				Unigene1603_merge	Sulfurovum sp. 35-42-20	558	0.002534	2772	0.014426
				Unigene15765_merge	Sulfurovum sp. 35-42-20	1	4.54e-06	9	4.68e-05
				Unigene11591_merge	Sulfurovum sp. 35-42-20	0	0	10	5.2e-05
			OYZ47502.1	Unigene31158_merge	Sulfurovum sp. 24-42-9	4	1.82e-05	3	1.56e-05
				Unigene21339_merge	Sulfurovum sp. 24-42-9	3	1.36e-05	9	4.68e-05
				Unigene19418_merge	Sulfurovum sp. 24-42-9	2	9.08e-06	15	7.81e-05
				Unigene15274_merge	Sulfurovum sp. 24-42-9	0	0	2	1.04e-05
				CL2906.Contig2_merge	Sulfurovum sp. 24-42-9	15	6.81e-05	21	0.000109
				CL2906.Contig1_merge	Sulfurovum sp. 24-42-9	3	1.36e-05	14	7.29e-05
				Unigene4886_merge	Sulfurovum sp. 24-42-9	4	1.82e-05	4	2.08e-05
			PHQ65947.1	Unigene24869_merge	Sulfurimonas sp.	0	0	5	2.6e-05
			PHQ65948.1	Unigene13756_merge	Sulfurimonas sp.	2	9.08e-06	7	3.64e-05
			PHR14464.1	Unigene21761_merge	Sulfurimonas sp.	0	0	6	3.12e-05
			PHS40967.1	Unigene16644_merge	Sulfurovum sp.	0	0	19	9.89e-05
				Unigene5805_merge	Sulfurovum sp.	0	0	8	4.16e-05
			WP_008242082.1	Unigene5728_merge	Sulfurovum sp. AR	0	0	11	5.72e-05
				Unigene5727_merge	Sulfurovum sp. AR	1	4.54e-06	29	0.000151
				Unigene5565_merge	Sulfurovum sp. AR	1	4.54e-06	35	0.000182
				Unigene5564_merge	Sulfurovum sp. AR	0	0	9	4.68e-05
				Unigene5563_merge	Sulfurovum sp. AR	7	3.18e-05	38	0.000198
				Unigene3862_merge	Sulfurovum sp. AR	2	9.08e-06	7	3.64e-05
				Unigene3339_merge	Sulfurovum sp. AR	3	1.36e-05	23	0.00012
				Unigene31100_merge	Sulfurovum sp. AR	4	1.82e-05	1	5.2e-06
				Unigene2866_merge	Sulfurovum sp. AR	5	2.27e-05	8	4.16e-05
				Unigene2639_merge	Sulfurovum sp. AR	295	0.00134	282	0.001468
				Unigene2371_merge	Sulfurovum sp. AR	7	3.18e-05	46	0.000239
				Unigene20807_merge	Sulfurovum sp. AR	1	4.54e-06	9	4.68e-05
				Unigene2007_merge	Sulfurovum sp. AR	15	6.81e-05	139	0.000723
				Unigene17387_merge	Sulfurovum sp. AR	2	9.08e-06	23	0.00012
				Unigene1418_merge	Sulfurovum sp. AR	35	0.000159	84	0.000437
				CL2906.Contig4_merge	Sulfurovum sp. AR	3	1.36e-05	26	0.000135
				CL2906.Contig3_merge	Sulfurovum sp. AR	5	2.27e-05	59	0.000307
				Unigene5562_merge	Sulfurovum sp. AR	0	0	10	5.2e-05
				Unigene15848_merge	Sulfurovum sp. AR	0	0	2	1.04e-05
				Unigene5214_merge	Sulfurovum sp. AR	8	3.63e-05	22	0.000114
			WP_011979894.1	Unigene13134_merge	Sulfurovum sp. NBC37-1	1	4.54e-06	8	4.16e-05
				CL2294.Contig2_merge	Sulfurovum sp. NBC37-1	1	4.54e-06	1	5.2e-06
			WP_015419643.1	Unigene27288_merge	Hydrogenobaculum	6	2.72e-05	4	2.08e-05
			WP_092910178.1	Unigene12549_merge	Hydrogenimonas thermophila	0	0	4	2.08e-05
	Pyruvate/ketoisovalerate oxidoreductase	1.2.7.1/1.2.7.7	PHS41100.1	Unigene4291_merge	Sulfurovum sp.	10	4.54e-05	170	0.000885
			KIM04573.1	Unigene1198_merge	Sulfurovum sp. AS07-7	11	5e-05	18	9.37e-05
			OYY30342.1	Unigene11568_merge	Sulfurovum sp. 35-42-20	0	0	8	4.16e-05
				Unigene5781_merge	Sulfurovum sp. 35-42-20	1	4.54e-06	8	4.16e-05
			PHR14453.1	Unigene29822_merge	Sulfurimonas sp.	3	1.36e-05	6	3.12e-05
				Unigene2247_merge	Sulfurimonas sp.	12	5.45e-05	46	0.000239
			PHS34525.1	Unigene9014_merge	Sulfurovum sp.	2	9.08e-06	6	3.12e-05
				Unigene9084_merge	Sulfurovum sp.	2	9.08e-06	13	6.77e-05
				Unigene18959_merge	Sulfurovum sp.	7	3.18e-05	50	0.00026
				Unigene16788_merge	Sulfurovum sp.	7	3.18e-05	83	0.000432
				Unigene4815_merge	Sulfurovum sp.	22	9.99e-05	301	0.001567
			PHS40965.1	Unigene26671_merge	Sulfurovum sp.	12	5.45e-05	21	0.000109
			PHS41100.1	Unigene21014_merge	Sulfurovum sp.	0	0	6	3.12e-05
				Unigene11456_merge	Sulfurovum sp.	3	1.36e-05	12	6.25e-05
				CL2475.Contig1_merge	Sulfurovum sp.	2	9.08e-06	13	6.77e-05
			WP_008242036.1	Unigene29823_merge	Sulfurovum sp. AR	21	9.54e-05	61	0.000317
				Unigene20196_merge	Sulfurovum sp. AR	2	9.08e-06	16	8.33e-05
				Unigene19997_merge	Sulfurovum sp. AR	3	1.36e-05	46	0.000239
				Unigene16388_merge	Sulfurovum sp. AR	0	0	8	4.16e-05
				Unigene29861_merge	Sulfurovum sp. AR	5	2.27e-05	23	0.00012
				Unigene20146_merge	Sulfurovum sp. AR	11	5e-05	19	9.89e-05
				CL2475.Contig2_merge	Sulfurovum sp. AR	0	0	1	5.2e-06
			WP_008242083.1	Unigene2687_merge	Sulfurovum sp. AR	9	4.09e-05	47	0.000245
			WP_008242085.1	Unigene323_merge	Sulfurovum sp. AR	17	7.72e-05	50	0.00026
				Unigene8879_merge	Sulfurovum sp. AR	3	1.36e-05	9	4.68e-05
				Unigene5281_merge	Sulfurovum sp. AR	32	0.000145	412	0.002144
				Unigene5280_merge	Sulfurovum sp. AR	1	4.54e-06	94	0.000489
				Unigene18958_merge	Sulfurovum sp. AR	0	0	20	0.000104
				Unigene18845_merge	Sulfurovum sp. AR	0	0	19	9.89e-05
				Unigene18844_merge	Sulfurovum sp. AR	0	0	11	5.72e-05
				Unigene1807_merge	Sulfurovum sp. AR	18	8.17e-05	149	0.000775
				Unigene16155_merge	Sulfurovum sp. AR	4	1.82e-05	150	0.000781
				Unigene11407_merge	Sulfurovum sp. AR	4	1.82e-05	16	8.33e-05
				Unigene5279_merge	Sulfurovum sp. AR	3	1.36e-05	14	7.29e-05
				Unigene3707_merge	Sulfurovum sp. AR	23	0.000104	235	0.001223
	2-oxoglutarate ferredoxin oxidoreductase	1.2.7.3	DAB41369.1	Unigene28545_merge	Sulfurovum sp. UBA12169	9	4.09e-05	1	5.2e-06
			EHP31180.1	Unigene18876_merge	Sulfurimonas gotlandica GD1	0	0	6	3.12e-05
			KIM04330.1	CL786.Contig5_merge	Sulfurovum sp. AS07-7	5	2.27e-05	0	0
			OYY55219.1	Unigene20250_merge	Sulfurovum sp. 28-43-6	1	4.54e-06	3	1.56e-05
			PHR14456.1	Unigene21809_merge	Sulfurimonas sp	0	0	4	2.08e-05
			WP_008242028.1	Unigene5780_merge	Sulfurovum sp. AR	1	4.54e-06	13	6.77e-05
				Unigene5779_merge	Sulfurovum sp. AR	2	9.08e-06	51	0.000265
				Unigene3251_merge	Sulfurovum sp. AR	8	3.63e-05	71	0.00037
				CL2169.Contig2_merge	Sulfurovum sp. AR	3	1.36e-05	7	3.64e-05
				CL2169.Contig1_merge	Sulfurovum sp. AR	0	0	11	5.72e-05
				Unigene4128_merge	Sulfurovum sp. AR	10	4.54e-05	38	0.000198
			WP_012663736.1	CL773.Contig4_merge	Nautilia profundicola	0	0	7	3.64e-05
			WP_013326924.1	Unigene6435_merge	Sulfurimonas autotrophica	0	0	3	1.56e-05
				CL773.Contig2_merge	Sulfurimonas autotrophica	15	6.81e-05	3	1.56e-05
			WP_013460316.1	Unigene27522_merge	Sulfuricurvum kujiense	5	2.27e-05	0	0
			WP_015902168.1	Unigene9111_merge	Nautilia profundicola	3	1.36e-05	19	9.89e-05
			WP_015902837.1	Unigene7261_merge	Nautilia profundicola	0	0	7	3.64e-05
			WP_046551455.1	CL786.Contig2_merge	Sulfurovum lithotrophicum	0	0	4	2.08e-05
			WP_046551456.1	Unigene26551_merge	Sulfurovum lithotrophicum	0	0	3	1.56e-05
			WP_067330680.1	Unigene11396_merge	Sulfurovum riftiae	1	4.54e-06	13	6.77e-05
				CL786.Contig4_merge	Sulfurovum riftiae	81	0.000368	87	0.000453
				CL786.Contig3_merge	Sulfurovum riftiae	11	5e-05	25	0.00013
			WP_067330682.1	Unigene2357_merge	Sulfurovum riftiae	6	2.72e-05	13	6.77e-05
			WP_067330685.1	CL786.Contig1_merge	Sulfurovum riftiae	6	2.72e-05	69	0.000359
				CL773.Contig3_merge	Sulfurovum riftiae	22	9.99e-05	51	0.000265
				Unigene16750_merge	Sulfurovum riftiae	1	4.54e-06	16	8.33e-05
				Unigene1184_merge	Sulfurovum riftiae	37	0.000168	66	0.000343
			WP_096258475.1	CL773.Contig1_merge	Lebetimonas natsushimae	2678	0.012162	1170	0.006089
	succinate dehydrogenase	1.3.99.1	KIM06762.1	Unigene26711_merge	Sulfurovum sp. FS06-10	2	9.08e-06	1	5.2e-06
				CL353.Contig2_merge	Sulfurovum sp. FS06-10	4	1.82e-05	22	0.000114
				CL353.Contig1_merge	Sulfurovum sp. FS06-10	2	9.08e-06	10	5.2e-05
				Unigene11838_merge	Sulfurovum sp. FS06-10	0	0	7	3.64e-05
			WP_013327057.1	CL109.Contig2_merge	Sulfurimonas autotrophica	1	4.54e-06	6	3.12e-05
			CUV65666.1	CL2535.Contig4_merge	Sulfurovum sp. enrichment culture clone C5	47	0.000213	216	0.001124
			DAB40978.1	Unigene22076_merge	Sulfurovum sp. UBA12169	1	4.54e-06	9	4.68e-05
			KIM06762.1	Unigene16756_merge	Sulfurovum sp. FS06-10	1	4.54e-06	17	8.85e-05
			KIM06763.1	Unigene14615_merge	Sulfurovum sp. FS06-10	0	0	10	5.2e-05
				Unigene11183_merge	Sulfurovum sp. FS06-10	5	2.27e-05	19	9.89e-05
			OHD93999.1	Unigene9437_merge	Sulfurimonas sp. GWF2_37_8	0	0	2	1.04e-05
			OHE01899.1	CL2535.Contig2_merge	Sulfurimonas sp. RIFCSPLOWO2_12_36_12	0	0	2	1.04e-05
			OQX75091.1	Unigene8433_merge	Campylobacteraceae bacterium 4484_4	0	0	8	4.16e-05
				Unigene24157_merge	Campylobacteraceae bacterium 4484_4	1	4.54e-06	5	2.6e-05
			PHR55031.1	Unigene24230_merge	Arcobacter sp.	0	0	5	2.6e-05
				Unigene16422_merge	Arcobacter sp.	2	9.08e-06	20	0.000104
				Unigene9008_merge	Arcobacter sp.	0	0	13	6.77e-05
			PHR55032.1	Unigene22747_merge	Arcobacter sp.	0	0	8	4.16e-05
				Unigene21734_merge	Arcobacter sp.	0	0	9	4.68e-05
			PLY10245.1	Unigene26058_merge	Sulfurimonas sp.	0	0	1	5.2e-06
			PLY10245.1	Unigene7941_merge	Sulfurimonas sp.	0	0	5	2.6e-05
			WP_007473029.1	Unigene1712_merge	Caminibacter mediatlanticus	152	0.00069	152	0.000791
			WP_007473191.1	Unigene23107_merge	Caminibacter mediatlanticus	1	4.54e-06	5	2.6e-05
			WP_008337520.1	CL109.Contig1_merge	Sulfurimonas gotlandica	2	9.08e-06	11	5.72e-05
			WP_012674239.1	Unigene1937_merge	Sulfurihydrogenibium azorense	167	0.000758	85	0.000442
			WP_013327058.1	Unigene31167_merge	Sulfurimonas autotrophica	5	2.27e-05	0	0
				Unigene22617_merge	Sulfurimonas autotrophica	0	0	6	3.12e-05
				Unigene20918_merge	Sulfurimonas autotrophica	3	1.36e-05	9	4.68e-05
			WP_013554020.1	Unigene14865_merge	Nitratifractor salsuginis	6	2.72e-05	6	3.12e-05
				Unigene13305_merge	Nitratifractor salsuginis	1	4.54e-06	11	5.72e-05
			WP_013554021.1	Unigene31236_merge	Nitratifractor salsuginis	3	1.36e-05	0	0
				Unigene10819_merge	Nitratifractor salsuginis	1	4.54e-06	4	2.08e-05
				CL2535.Contig3_merge	Nitratifractor salsuginis	2	9.08e-06	15	7.81e-05
			WP_021288401.1	Unigene8078_merge	Sulfurimonas hongkongensis	0	0	2	1.04e-05
			WP_076713580.1	Unigene409_merge	Desulfurobacterium indicum	126	0.000572	48	0.00025
			WP_096258546.1	Unigene243_merge	Lebetimonas natsushimae	156	0.000708	94	0.000489
	ATP citrate lyase	2.3.3.8	ABV48827.1	Unigene26608_merge	Sulfurimonas autotrophica	2	9.08e-06	10	5.2e-05
			EJF06237.1	CL352.Contig7_merge	Thiovulum sp. ES	2	9.08e-06	10	5.2e-05
				CL352.Contig4_merge	Thiovulum sp. ES	0	0	7	3.64e-05
			PHR10504.1	Unigene29930_merge	Sulfurimonas sp.	10	4.54e-05	20	0.000104
				CL352.Contig2_merge	Sulfurimonas sp.	149	0.000677	911	0.004741
			PHR55705.1	CL352.Contig6_merge	Arcobacter sp.	1	4.54e-06	46	0.000239
				Unigene8682_merge	Arcobacter sp.	0	0	11	5.72e-05
				Unigene5798_merge	Arcobacter sp.	0	0	2	1.04e-05
			AAZ74671.1	CL1043.Contig3_merge	Sulfurovum lithotrophicum	8	3.63e-05	127	0.000661
				Unigene30843_merge	Sulfurovum lithotrophicum	5	2.27e-05	0	0
			AAZ74674.1	Unigene3927_merge	Sulfurimonas sp. Go25-1	5	2.27e-05	4	2.08e-05
			ABV48828.1	Unigene19206_merge	Sulfurovum lithotrophicum	1	4.54e-06	8	4.16e-05
			CUV65950.1	CL352.Contig1_merge	Sulfurovum sp. enrichment culture clone C5	0	0	3	1.56e-05
			KFN40816.1	Unigene17362_merge	Sulfuricurvum sp. MLSB	0	0	2	1.04e-05
				Unigene19205_merge	Sulfuricurvum sp. MLSB	3	1.36e-05	3	1.56e-05
			OHD84602.1	Unigene29285_merge	Sulfuricurvum sp. RIFCSPHIGHO2_02_FULL_43_9	7	3.18e-05	0	0
			OHD92742.1	Unigene23570_merge	Sulfuricurvum sp. RIFOXYD2_FULL_44_160	0	0	6	3.12e-05
			OYY30236.1	Unigene24435_merge	Sulfurovum sp. 35-42-20	1	4.54e-06	6	3.12e-05
			PHQ92283.1	Unigene5581_merge	Sulfurimonas sp.	0	0	4	2.08e-05
			PHQ92284.1	Unigene19713_merge	Sulfurimonas sp.	0	0	17	8.85e-05
			WP_008245184.1	Unigene19712_merge	Sulfurovum sp. AR	10	4.54e-05	74	0.000385
			WP_011980234.1	Unigene23781_merge	Sulfurovum sp. NBC37-1	0	0	4	2.08e-05
			WP_011980235.1	Unigene5404_merge	Sulfurovum sp. NBC37-1	0	0	8	4.16e-05
				Unigene2881_merge	Sulfurovum sp. NBC37-1	12	5.45e-05	8	4.16e-05
				Unigene15724_merge	Sulfurovum sp. NBC37-1	5	2.27e-05	2	1.04e-05
			WP_013327378.1	CL1043.Contig2_merge	Sulfurimonas autotrophica	6	2.72e-05	2	1.04e-05
			WP_013459529.1	Unigene5764_merge	Sulfuricurvum kujiense	0	0	13	6.77e-05
			WP_013553540.1	Unigene28474_merge	Nitratifractor salsuginis	6	2.72e-05	1	5.2e-06
				Unigene25010_merge	Nitratifractor salsuginis	0	0	3	1.56e-05
			WP_046551483.1	Unigene23897_merge	Sulfurovum lithotrophicum	0	0	1	5.2e-06
			WP_046551484.1	Unigene20682_merge	Sulfurovum lithotrophicum	0	0	10	5.2e-05
			WP_067329517.1	Unigene20531_merge	Sulfurovum riftiae	2	9.08e-06	14	7.29e-05
			WP_067329520.1	Unigene19207_merge	Sulfurovum riftiae	2	9.08e-06	23	0.00012
			WP_096259766.1	CL352.Contig3_merge	Lebetimonas natsushimae	1065	0.004837	980	0.0051
	ATP-citrate lyase /succinyl-CoA ligase	2.3.3.8/6.2.1.5	WP_008245177.1	Unigene12120_merge	Sulfurovum sp. AR	1	4.54e-06	2	1.04e-05
				Unigene25984_merge	Sulfurovum sp. AR	0	0	2	1.04e-05
			WP_013327377.1	Unigene6437_merge	Sulfurimonas autotrophica	1	4.54e-06	6	3.12e-05
				Unigene25268_merge	Sulfurimonas autotrophica	2	9.08e-06	5	2.6e-05
				Unigene1511_merge	Sulfurimonas autotrophica	8	3.63e-05	12	6.25e-05
			WP_013553541.1	Unigene22363_merge	Nitratifractor salsuginis	0	0	6	3.12e-05
	phosphoenolpyruvate synthase	2.7.9.2	WP_096258574.1	Unigene4834_merge	Lebetimonas natsushimae	322	0.001462	173	0.0009
				Unigene4043_merge	Lebetimonas natsushimae	32	0.000145	23	0.00012
	phosphoenolpyruvate carboxykinase	4.1.1.49	KIM09533.1	CL2272.Contig1_merge	Sulfurovum sp. FS06-10	0	0	17	8.85e-05
				CL1881.Contig6_merge	Sulfurovum sp. FS06-10	1	4.54e-06	6	3.12e-05
				CL926.Contig1_merge	Sulfurovum sp. FS06-10	1	4.54e-06	5	2.6e-05
				CL2272.Contig2_merge	Sulfurovum sp. FS06-10	0	0	5	2.6e-05
			OYY30824.1	Unigene25737_merge	Sulfurovum sp. 35-42-20	0	0	3	1.56e-05
				CL1881.Contig5_merge	Sulfurovum sp. 35-42-20	0	0	3	1.56e-05
				CL1881.Contig4_merge	Sulfurovum sp. 35-42-20	1	4.54e-06	31	0.000161
			PHR15863.1	Unigene21585_merge	Sulfurimonas sp.	0	0	9	4.68e-05
			PHR57066.1	Unigene18704_merge	Arcobacter sp.	1	4.54e-06	4	2.08e-05
			PHS39360.1	CL1881.Contig3_merge	Sulfurovum sp.	26	0.000118	81	0.000422
			WP_008336972.1	Unigene22168_merge	Sulfurimonas gotlandica	4	1.82e-05	9	4.68e-05
			WP_011981115.1	Unigene23944_merge	Sulfurovum sp. NBC37-1	1	4.54e-06	4	2.08e-05
			WP_013554198.1	Unigene22262_merge	Nitratifractor salsuginis	4	1.82e-05	11	5.72e-05
			WP_021286893.1	Unigene24916_merge	Sulfurimonas hongkongensis	0	0	5	2.6e-05
			WP_046551159.1	CL926.Contig2_merge	Sulfurovum lithotrophicum	0	0	5	2.6e-05
				CL1881.Contig1_merge	Sulfurovum lithotrophicum	0	0	27	0.000141
				CL1881.Contig2_merge	Sulfurovum lithotrophicum	0	0	15	7.81e-05
			WP_096260205.1	CL926.Contig3_merge	Lebetimonas natsushimae	804	0.003651	680	0.003539
	citrate lyase	4.1.3.6	CUV65531.1	Unigene24820_merge	Sulfurovum sp. enrichment culture clone C5	0	0	4	2.08e-05
	fumarate hydratase	4.2.1.2	PHR55458.1	CL2882.Contig1_merge	Arcobacter sp.	0	0	6	3.12e-05
			OYY27796.1	CL122.Contig4_merge	Sulfurovum sp. 35-42-20	0	0	21	0.000109
			OYZ60489.1	Unigene7727_merge	Sulfuricurvum sp. 24-42-5	0	0	3	1.56e-05
			PHQ55449.1	Unigene7726_merge	Sulfurimonas sp.	0	0	3	1.56e-05
			PHS34172.1	CL122.Contig2_merge	Sulfurovum sp.	7	3.18e-05	18	9.37e-05
				CL122.Contig1_merge	Sulfurovum sp.	80	0.000363	355	0.001848
				Unigene21862_merge	Sulfurovum sp.	0	0	6	3.12e-05
				CL122.Contig6_merge	Sulfurovum sp.	1	4.54e-06	2	1.04e-05
				CL122.Contig3_merge	Sulfurovum sp.	3	1.36e-05	6	3.12e-05
			WP_008241710.1	Unigene23692_merge	Sulfurovum sp. AR	0	0	5	2.6e-05
			WP_013326919.1	Unigene8798_merge	Sulfurimonas autotrophica	3	1.36e-05	13	6.77e-05
				Unigene16796_merge	Sulfurimonas autotrophica	0	0	4	2.08e-05
				CL2882.Contig2_merge	Sulfurimonas autotrophica	1	4.54e-06	3	1.56e-05
			WP_013460321.1	Unigene24471_merge	Sulfuricurvum kujiense	0	0	3	1.56e-05
			WP_067330666.1	CL122.Contig5_merge	Sulfurovum riftiae	7	3.18e-05	20	0.000104
	aconitase（aconitate hydratase）	4.2.1.3	EJF06939.1	CL153.Contig2_merge	Thiovulum sp. ES	2	9.08e-06	0	0
	bifunctional aconitate hydratase 2 / 2-methylisocitrate dehydratase	4.2.1.3/4.2.1.99	OQX74528.1	CL153.Contig1_merge	Campylobacteraceae bacterium 4484_4	7	3.18e-05	5	2.6e-05
			PHR14565.1	CL864.Contig2_merge	Sulfurimonas sp.	1	4.54e-06	9	4.68e-05
				CL864.Contig1_merge	Sulfurimonas sp.	0	0	4	2.08e-05
			PHR14565.1	Unigene5756_merge	Sulfurimonas sp.	0	0	4	2.08e-05
				Unigene19481_merge	Sulfurimonas sp.	0	0	12	6.25e-05
				Unigene15095_merge	Sulfurimonas sp.	0	0	3	1.56e-05
				Unigene10945_merge	Sulfurimonas sp.	2	9.08e-06	4	2.08e-05
				Unigene28402_merge	Sulfurimonas sp.	3	1.36e-05	0	0
				CL2221.Contig2_merge	Sulfurimonas sp.	0	0	12	6.25e-05
				CL2221.Contig1_merge	Sulfurimonas sp.	1	4.54e-06	18	9.37e-05
				CL2482.Contig2_merge	Sulfurimonas sp.	2	9.08e-06	25	0.00013
				CL2482.Contig1_merge	Sulfurimonas sp.	4	1.82e-05	1	5.2e-06
			PLY13975.1	Unigene3377_merge	Sulfurimonas sp.	14	6.36e-05	10	5.2e-05
				Unigene21863_merge	Sulfurimonas sp.	2	9.08e-06	10	5.2e-05
			WP_008337218.1	Unigene15585_merge	Sulfurimonas gotlandica	0	0	6	3.12e-05
			WP_013326911.1	Unigene3440_merge	Sulfurimonas autotrophica	4	1.82e-05	18	9.37e-05
				Unigene2818_merge	Sulfurimonas autotrophica	7	3.18e-05	3	1.56e-05
				Unigene281_merge	Sulfurimonas autotrophica	8	3.63e-05	10	5.2e-05
				Unigene27363_merge	Sulfurimonas autotrophica	4	1.82e-05	2	1.04e-05
				Unigene27251_merge	Sulfurimonas autotrophica	3	1.36e-05	5	2.6e-05
				Unigene14639_merge	Sulfurimonas autotrophica	5	2.27e-05	10	5.2e-05
			WP_013460045.1	CL2517.Contig3_merge	Sulfuricurvum kujiense	0	0	5	2.6e-05
				CL2517.Contig2_merge	Sulfuricurvum kujiense	1	4.54e-06	8	4.16e-05
				CL2517.Contig1_merge	Sulfuricurvum kujiense	2	9.08e-06	12	6.25e-05
			WP_013553742.1	Unigene1579_merge	Nitratifractor salsuginis	45	0.000204	27	0.000141
			WP_021288355.1	Unigene7794_merge	Sulfurimonas hongkongensis	2	9.08e-06	4	2.08e-05
			WP_025803384.1	Unigene16640_merge	Campylobacter corcagiensis	0	0	16	8.33e-05
			GAX87618.1	CL1284.Contig1_merge	Lebetimonas natsushimae	1489	0.006762	858	0.004465
			KIM04543.1	Unigene14883_merge	Sulfurovum sp. AS07-7	4	1.82e-05	13	6.77e-05
			OHD97193.1	Unigene335_merge	Sulfurimonas sp. RIFCSPLOWO2_02_FULL_36_28	7	3.18e-05	5	2.6e-05
			OYY26807.1	CL1813.Contig9_merge	Sulfurovum sp. 35-42-20	0	0	5	2.6e-05
				CL1813.Contig7_merge	Sulfurovum sp. 35-42-20	48	0.000218	252	0.001311
				CL1813.Contig6_merge	Sulfurovum sp. 35-42-20	150	0.000681	844	0.004392
				CL1813.Contig3_merge	Sulfurovum sp. 35-42-20	0	0	2	1.04e-05
				CL1813.Contig2_merge	Sulfurovum sp. 35-42-20	5	2.27e-05	36	0.000187
				CL1813.Contig12_merge	Sulfurovum sp. 35-42-20	0	0	2	1.04e-05
				CL1813.Contig1_merge	Sulfurovum sp. 35-42-20	1	4.54e-06	10	5.2e-05
			PHR14565.1	CL820.Contig2_merge	Sulfurimonas sp.	0	0	36	0.000187
			PHR58851.1	CL820.Contig1_merge	Arcobacter sp.	2	9.08e-06	3	1.56e-05
			PHS30245.1	CL180.Contig2_merge	Sulfurovum sp.	14	6.36e-05	108	0.000562
			PHS37055.1	Unigene23931_merge	Sulfurovum sp.	0	0	5	2.6e-05
				Unigene18842_merge	Sulfurovum sp.	0	0	9	4.68e-05
				CL1813.Contig5_merge	Sulfurovum sp.	29	0.000132	211	0.001098
				CL180.Contig1_merge	Sulfurovum sp.	0	0	4	2.08e-05
			PLY13975.1	Unigene3360_merge	Sulfurimonas sp.	4	1.82e-05	8	4.16e-05
			WP_044415349.1	CL1813.Contig11_merge	Arcobacter anaerophilus	0	0	7	3.64e-05
			WP_046550746.1	Unigene9893_merge	Sulfurovum lithotrophicum	0	0	3	1.56e-05
				CL1813.Contig4_merge	Sulfurovum lithotrophicum	10	4.54e-05	18	9.37e-05
			WP_067328629.1	Unigene7211_merge	Sulfurovum riftiae	0	0	5	2.6e-05
				Unigene5317_merge	Sulfurovum riftiae	0	0	3	1.56e-05
				Unigene21157_merge	Sulfurovum riftiae	1	4.54e-06	6	3.12e-05
				Unigene17277_merge	Sulfurovum riftiae	7	3.18e-05	12	6.25e-05
				CL1813.Contig8_merge	Sulfurovum riftiae	2	9.08e-06	0	0
				CL1813.Contig10_merge	Sulfurovum riftiae	2	9.08e-06	3	1.56e-05
			WP_084275821.1	Unigene28115_merge	Nitratiruptor tergarcus	3	1.36e-05	0	0
			WP_099341104.1	Unigene3405_merge	Arcobacter molluscorum	17	7.72e-05	23	0.00012
			WP_101185922.1	Unigene8318_merge	Arcobacter halophilus	0	0	3	1.56e-05
	acetyl-CoA synthetase	6.2.1.1	KIM07376.1	Unigene4814_merge	Sulfurovum sp. FS06-10	35	0.000159	32	0.000167
				Unigene22454_merge	Sulfurovum sp. FS06-10	0	0	3	1.56e-05
				Unigene15281_merge	Sulfurovum sp. FS06-10	0	0	5	2.6e-05
			PHQ64739.1	Unigene15236_merge	Sulfurimonas sp.	0	0	7	3.64e-05
			PHR58072.1	Unigene23526_merge	Arcobacter sp.	2	9.08e-06	9	4.68e-05
			PHS56071.1	Unigene15280_merge	Sulfurimonas sp.	0	0	3	1.56e-05
				CL1131.Contig2_merge	Sulfurimonas sp.	0	0	2	1.04e-05
			WP_008242768.1	Unigene1867_merge	Sulfurovum sp. AR	9	4.09e-05	23	0.00012
				Unigene17581_merge	Sulfurovum sp. AR	1	4.54e-06	21	0.000109
				Unigene13582_merge	Sulfurovum sp. AR	0	0	3	1.56e-05
			WP_008243866.1	Unigene24050_merge	Sulfurovum sp. AR	0	0	3	1.56e-05
			WP_011980838.1	Unigene3514_merge	Sulfurovum sp. NBC37-1	29	0.000132	27	0.000141
				Unigene12979_merge	Sulfurovum sp. NBC37-1	0	0	6	3.12e-05
				CL435.Contig2_merge	Sulfurovum sp. NBC37-1	17	7.72e-05	50	0.00026
			WP_046551077.1	Unigene20407_merge	Sulfurovum lithotrophicum	0	0	9	4.68e-05
				Unigene19412_merge	Sulfurovum lithotrophicum	4	1.82e-05	32	0.000167
				CL435.Contig4_merge	Sulfurovum lithotrophicum	9	4.09e-05	19	9.89e-05
				CL435.Contig3_merge	Sulfurovum lithotrophicum	0	0	7	3.64e-05
			WP_096259023.1	CL435.Contig1_merge	Lebetimonas natsushimae	410	0.001862	196	0.00102
				CL1131.Contig1_merge	Lebetimonas natsushimae	0	0	5	2.6e-05
	succinyl-CoA synthetase	6.2.1.5	CUV65845.1	CL764.Contig11_merge	Sulfurovum sp. enrichment culture clone C5	0	0	7	3.64e-05
			KIM07901.1	CL764.Contig1_merge	Sulfurovum sp. FS06-10	49	0.000223	193	0.001004
			KIM07902.1	CL476.Contig2_merge	Sulfurovum sp. FS06-10	8	3.63e-05	42	0.000219
				CL476.Contig1_merge	Sulfurovum sp. FS06-10	5	2.27e-05	96	0.0005
			OYY27794.1	Unigene5381_merge	Sulfurovum sp. 35-42-20	0	0	5	2.6e-05
			PHQ55447.1	Unigene5382_merge	Sulfurimonas sp.	0	0	8	4.16e-05
				CL2486.Contig2_merge	Sulfurimonas sp.	1	4.54e-06	16	8.33e-05
				CL764.Contig6_merge	Sulfurimonas sp.	3	1.36e-05	18	9.37e-05
				CL764.Contig10_merge	Sulfurimonas sp.	0	0	2	1.04e-05
			PHQ55448.1	CL764.Contig4_merge	Sulfurimonas sp.	0	0	1	5.2e-06
				Unigene19843_merge	Sulfurimonas sp.	1	4.54e-06	11	5.72e-05
				CL764.Contig2_merge	Sulfurimonas sp.	0	0	2	1.04e-05
			PHR55460.1	CL764.Contig9_merge	Arcobacter sp.	0	0	6	3.12e-05
			PHR55460.1	Unigene25705_merge	Arcobacter sp.	0	0	3	1.56e-05
			PHS34174.1	Unigene5026_merge	Sulfurovum sp.	1	4.54e-06	3	1.56e-05
			PHS36900.1	CL764.Contig5_merge	Sulfurovum sp.	2	9.08e-06	6	3.12e-05
				CL764.Contig12_merge	Sulfurovum sp.	1	4.54e-06	8	4.16e-05
				CL2486.Contig1_merge	Sulfurovum sp.	0	0	11	5.72e-05
			WP_008241713.1	Unigene219_merge	Sulfurovum sp. AR	11	5e-05	46	0.000239
			WP_011980269.1	CL764.Contig3_merge	Sulfurovum sp. NBC37-1	0	0	8	4.16e-05
			WP_013326920.1	Unigene26776_merge	Sulfurimonas autotrophica	12	5.45e-05	58	0.000302
				Unigene26692_merge	Sulfurimonas autotrophica	14	6.36e-05	12	6.25e-05
				CL476.Contig3_merge	Sulfurimonas autotrophica	11	5e-05	45	0.000234
			WP_013326921.1	CL764.Contig7_merge	Sulfurimonas autotrophica	3	1.36e-05	0	0
			WP_046551457.1	Unigene16120_merge	Sulfurovum lithotrophicum	0	0	20	0.000104
				Unigene12610_merge	Sulfurovum lithotrophicum	1	4.54e-06	8	4.16e-05
			WP_067330669.1	Unigene5263_merge	Sulfurovum riftiae	0	0	8	4.16e-05
Nitrogen Cycle	ammonia monooxygenase	1.14.99.39	ADJ94164.1	CL2666.Contig2_merge	uncultured crenarchaeote	15	6.81e-05	39	0.000203
			AGJ93633.1	CL2666.Contig1_merge	uncultured crenarchaeote	113	0.000513	224	0.001166
			AJM93360.1	Unigene3564_merge	Candidatus Nitrosopumilus piranensis	27	0.000123	114	0.000593
			AIF09481.1	CL2612.Contig1_merge	uncultured marine thaumarchaeote KM3_37_D10	115	0.000522	318	0.001655
			EIJ67027.1	CL2612.Contig2_merge	Candidatus Nitrosopumilus piranensis	593	0.002693	1487	0.007739
	glutamate synthase (NADPH)	1.4.1.13	KEF29735.1	Unigene13846_merge	Marinobacter nitratireducens	1	4.54e-06	4	2.08e-05
			ODJ87943.1	Unigene7151_merge	Candidatus Thiodiazotropha endolucinida	0	0	6	3.12e-05
			SDM34194.1	Unigene1432_merge	Geoalkalibacter ferrihydriticus	329	0.001494	135	0.000703
				Unigene8155_merge	Geoalkalibacter ferrihydriticus	1	4.54e-06	6	3.12e-05
				Unigene7140_merge	Geoalkalibacter ferrihydriticus	1	4.54e-06	6	3.12e-05
				Unigene15112_merge	Geoalkalibacter ferrihydriticus	1	4.54e-06	15	7.81e-05
				Unigene11647_merge	Geoalkalibacter ferrihydriticus	3	1.36e-05	33	0.000172
			AHF62740.1	Unigene4797_merge	Synechococcus sp. WH 8109	31	0.000141	464	0.002415
			ARE83642.1	Unigene25436_merge	Albidovulum inexpectatum	0	0	4	2.08e-05
			ARU47813.1	Unigene23617_merge	Sulfurospirillum sp. SL2-1	0	0	6	3.12e-05
				Unigene5526_merge	Sulfurospirillum sp. SL2-1	2	9.08e-06	24	0.000125
				CL222.Contig2_merge	Sulfurospirillum sp. SL2-1	1	4.54e-06	40	0.000208
				CL222.Contig1_merge	Sulfurospirillum sp. SL2-1	0	0	3	1.56e-05
				CL1901.Contig2_merge	Sulfurospirillum sp. SL2-1	10	4.54e-05	41	0.000213
				CL1901.Contig1_merge	Sulfurospirillum sp. SL2-1	1	4.54e-06	9	4.68e-05
				CL1430.Contig2_merge	Sulfurospirillum sp. SL2-1	29	0.000132	81	0.000422
				CL1430.Contig1_merge	Sulfurospirillum sp. SL2-1	1	4.54e-06	26	0.000135
			CCQ12316.1	Unigene27312_merge	Pseudoalteromonas luteoviolacea B = ATCC 29581	6	2.72e-05	0	0
			CUV65419.1	Unigene12701_merge	Sulfurovum sp. enrichment culture clone C5	0	0	3	1.56e-05
			EEP59862.1	CL2860.Contig2_merge	Sulfurihydrogenibium yellowstonense SS-5	0	0	3	1.56e-05
				CL2860.Contig1_merge	Sulfurihydrogenibium yellowstonense SS-5	9	4.09e-05	1	5.2e-06
			EIC21192.1	Unigene32334_merge	Thiorhodovibrio sp. 970	3	1.36e-05	3	1.56e-05
			GBE47890.1	Unigene21962_merge	bacterium BMS3Bbin12	0	0	9	4.68e-05
			KGE03996.1	Unigene8033_merge	Pseudohaliea rubra DSM 19751	0	0	5	2.6e-05
				Unigene12675_merge	Pseudohaliea rubra DSM 19751	0	0	3	1.56e-05
			KGM07825.1	Unigene23838_merge	Methylophaga thiooxydans	0	0	9	4.68e-05
				Unigene23997_merge	Methylophaga thiooxydans	1	4.54e-06	4	2.08e-05
			OAH05868.1	Unigene30479_merge	Rhodobacteraceae bacterium SB2	6	2.72e-05	0	0
				Unigene28922_merge	Rhodobacteraceae bacterium SB2	12	5.45e-05	4	2.08e-05
			OYY30689.1	Unigene9094_merge	Sulfurovum sp. 35-42-20	0	0	9	4.68e-05
				Unigene25002_merge	Sulfurovum sp. 35-42-20	0	0	5	2.6e-05
			OYY56421.1	Unigene17315_merge	Sulfurovum sp. 28-43-6	12	5.45e-05	45	0.000234
			PHR57842.1	Unigene10278_merge	Arcobacter sp.	0	0	4	2.08e-05
			PPR46614.1	Unigene9504_merge	Alphaproteobacteria bacterium MarineAlpha3_Bin5	0	0	5	2.6e-05
				Unigene19290_merge	Alphaproteobacteria bacterium MarineAlpha3_Bin5	2	9.08e-06	35	0.000182
				Unigene18443_merge	Alphaproteobacteria bacterium MarineAlpha3_Bin5	1	4.54e-06	12	6.25e-05
				Unigene18444_merge	Alphaproteobacteria bacterium MarineAlpha3_Bin5	1	4.54e-06	8	4.16e-05
			PPR77314.1	Unigene24283_merge	Alphaproteobacteria bacterium MarineAlpha3_Bin5	0	0	4	2.08e-05
			PTB83582.1	Unigene10344_merge	Sulfurovum lithotrophicum	0	0	5	2.6e-05
			SCZ66250.1	Unigene2751_merge	Roseovarius mucosus	89510	0.406519	55744	0.29011
				Unigene21161_merge	Thiohalomonas denitrificans	4	1.82e-05	17	8.85e-05
			SMF51564.1	Unigene25282_merge	Alteromonadaceae bacterium Bs31	0	0	6	3.12e-05
			AGA33216.1	Unigene26161_merge	Thioalkalivibrio nitratireducens DSM 14787	2	9.08e-06	4	2.08e-05
			AII85991.1	Unigene22175_merge	Planktomarina temperata RCA23	0	0	2	1.04e-05
			WP_013326854.1	Unigene27243_merge	Sulfurimonas autotrophica	7	3.18e-05	3	1.56e-05
			WP_014013419.1	Unigene31029_merge	Thermococcus sp. 4557	6	2.72e-05	0	0
			SPF79626.1	Unigene12670_merge	Primorskyibacter insulae	0	0	7	3.64e-05
			WP_038551281.1	Unigene20178_merge	Synechococcus sp. KORDI-52	26	0.000118	671	0.003492
			WP_067330935.1	CL1430.Contig3_merge	Sulfurovum riftiae	0	0	6	3.12e-05
			WP_096258888.1	Unigene4838_merge	Lebetimonas natsushimae	280	0.001272	310	0.001613
				Unigene1705_merge	Lebetimonas natsushimae	715	0.003247	465	0.00242
	glutamate synthase (NADH)	1.4.1.14	AFD03230.1	Unigene8306_merge	uncultured bacterium W4-39b	0	0	6	3.12e-05
	NAD-specific glutamate dehydrogenase	1.4.1.2	WP_063705557.1	CL1143.Contig1_merge	Pseudoalteromonas gelatinilytica	2	9.08e-06	1	5.2e-06
			BAC21186.1	Unigene10892_merge	Thermus thermophilus	0	0	6	3.12e-05
			OUW72663.1	Unigene11853_merge	Acidimicrobiaceae bacterium TMED210	5	2.27e-05	22	0.000114
			WP_006852030.1	Unigene18232_merge	Synechococcus sp. WH 8109	2	9.08e-06	15	7.81e-05
			WP_011363256.1	Unigene11957_merge	Synechococcus sp. CC9605	0	0	9	4.68e-05
			WP_015901815.1	Unigene23805_merge	Nautilia profundicola	0	0	4	2.08e-05
			WP_024592568.1	CL1924.Contig2_merge	Pseudoalteromonas sp. TB13	0	0	0	0
			WP_036968686.1	Unigene23457_merge	Pseudoalteromonas lipolytica	0	0	7	3.64e-05
			WP_053408610.1	Unigene27025_merge	Vibrio hepatarius	9	4.09e-05	0	0
				Unigene27719_merge	Vibrio hepatarius	1	4.54e-06	0	0
				Unigene30754_merge	Vibrio hepatarius	5	2.27e-05	0	0
				CL1924.Contig1_merge	Vibrio hepatarius	9	4.09e-05	0	0
			WP_054204731.1	Unigene25350_merge	Pseudoalteromonas	0	0	5	2.6e-05
			WP_061095046.1	Unigene28426_merge	Alteromonas macleodii	2	9.08e-06	0	0
			WP_067216347.1	Unigene28322_merge	Marinomonas gallaica	4	1.82e-05	0	0
			WP_074988262.1	CL1143.Contig2_merge	Pseudoalteromonas lipolytica	14	6.36e-05	0	0
				Unigene27114_merge	Pseudoalteromonas lipolytica	4	1.82e-05	1	5.2e-06
			WP_075593619.1	Unigene15720_merge	Pseudoalteromonas sp. PAB 2.2	3	1.36e-05	3	1.56e-05
	NADP-specific glutamate dehydrogenase	1.4.1.4	EHR76440.1	Unigene21651_merge	uncultured marine group II euryarchaeote	0	0	7	3.64e-05
			PDH21779.1	Unigene21403_merge	Marine Group II euryarchaeote MED-G37	0	0	13	6.77e-05
			PHX83675.1	Unigene10779_merge	Flavobacteriales bacterium	0	0	6	3.12e-05
			WP_008337785.1	Unigene12325_merge	Sulfurimonas gotlandica	0	0	4	2.08e-05
			WP_012083696.1	Unigene30929_merge	Sulfurovum sp. NBC37-1	6	2.72e-05	0	0
			WP_047119817.1	Unigene6693_merge	Arthrobacter	0	0	2	1.04e-05
	nitrate reductase (NADH)	1.7.1.1	WP_002709041.1	Unigene22997_merge	Thiothrix nivea	0	0	5	2.6e-05
	nitrite reductase (NAD(P)H)	1.7.1.4	WP_040728266.1	CL811.Contig4_merge	Thiomicrorhabdus sp. Kp2	24472	0.111142	74072	0.385495
	nitrite reductase (NO-forming)	1.7.2.1	AJM92066.1	Unigene2012_merge	Candidatus Nitrosopumilus piranensis	352	0.001599	2676	0.013927
			AIF23231.1	Unigene16576_merge	uncultured marine thaumarchaeote SAT1000_13_G01	0	0	7	3.64e-05
				CL2585.Contig2_merge	Candidatus Nitrosopelagicus brevis	32	0.000145	143	0.000744
				CL2585.Contig1_merge	Candidatus Nitrosopelagicus brevis	10	4.54e-05	26	0.000135
			WP_048105630.1	Unigene1471_merge	Candidatus Nitrosopelagicus brevis	36	0.000163	187	0.000973
	ferredoxin-nitrite reductase	1.7.7.1	PHS37468.1	Unigene8890_merge	Sulfurovum sp.	0	0	1	5.2e-06
			WP_008339916.1	Unigene31274_merge	Sulfurimonas gotlandica	5	2.27e-05	0	0
			WP_012083245.1	Unigene9226_merge	Sulfurovum sp. NBC37-1	0	0	16	8.33e-05
				Unigene8891_merge	Sulfurovum sp. NBC37-1	0	0	9	4.68e-05
				Unigene1597_merge	Sulfurovum sp. NBC37-1	33	0.00015	137	0.000713
	hydroxylamine reductase	1.7.99.1	WP_096260034.1	Unigene14011_merge	Lebetimonas natsushimae	1	4.54e-06	9	4.68e-05
	assimilatory nitrate reductase	1.7.99.4	ACB15211.1	Unigene8265_merge	uncultured marine group II euryarchaeote DeepAnt-15E7	0	0	5	2.6e-05
			AFW18576.1	Unigene25348_merge	uncultured bacterium	0	0	6	3.12e-05
			GAJ77804.1	Unigene20332_merge	Vibrio sp. JCM 18905	2	9.08e-06	34	0.000177
	dissimilatory nitrate reductase	1.7.99.4	AFV98618.1	Unigene8668_merge	uncultured Sulfuricurvum sp. RIFRC-1	0	0	9	4.68e-05
			CAJ72445.1	Unigene19156_merge	Candidatus Kuenenia stuttgartiensis	4	1.82e-05	44	0.000229
				Unigene11309_merge	Candidatus Kuenenia stuttgartiensis	0	0	3	1.56e-05
			CDL72834.1	Unigene9988_merge	uncultured Epsilonproteobacteria bacterium	2	9.08e-06	26	0.000135
				Unigene8532_merge	uncultured Epsilonproteobacteria bacterium	2	9.08e-06	23	0.00012
			EJF07820.1	Unigene7263_merge	Thiovulum sp. ES	0	0	7	3.64e-05
				Unigene22816_merge	Thiovulum sp. ES	0	0	6	3.12e-05
				CL2148.Contig2_merge	Thiovulum sp. ES	0	0	3	1.56e-05
				CL2148.Contig1_merge	Thiovulum sp. ES	0	0	6	3.12e-05
			GAX87920.1	Unigene1578_merge	Lebetimonas natsushimae	712	0.003234	361	0.001879
			KGM05988.1	Unigene15119_merge	Methylophaga thiooxydans	0	0	21	0.000109
			KMP11423.1	Unigene5001_merge	Nitrospina sp. SCGC_AAA799_A02	14	6.36e-05	12	6.25e-05
				Unigene14660_merge	Nitrospina sp. SCGC_AAA799_A02	0	0	7	3.64e-05
			PCH68051.1	Unigene28139_merge	Thiothrix nivea DSM 5205	2	9.08e-06	3	1.56e-05
			WP_015902263.1	Unigene3640_merge	Nautilia profundicola	41	0.000186	41	0.000213
			WP_042250442.1	Unigene19155_merge	Nitrospina gracilis	0	0	3	1.56e-05
				Unigene12206_merge	Nitrospina gracilis	1	4.54e-06	12	6.25e-05
			WP_046550776.1	Unigene25305_merge	Sulfurovum lithotrophicum	0	0	4	2.08e-05
			WP_048492943.1	Unigene1304_merge	Nitrospina sp. SCGC_AAA799_C22	9	4.09e-05	43	0.000224
				Unigene26310_merge	Nitrospina sp. SCGC_AAA799_C22	0	0	3	1.56e-05
				Unigene13778_merge	Nitrospina sp. SCGC_AAA799_C22	2	9.08e-06	6	3.12e-05
			WP_067329975.1	Unigene23927_merge	Sulfurovum riftiae	0	0	6	3.12e-05
			WP_093069495.1	Unigene18026_merge	Thiothrix nivea DSM 5205	10	4.54e-05	18	9.37e-05
	nitrite oxidoreductase	nxrB	AIA10107.1	Unigene6535_merge	uncultured Nitrospina sp.	1	4.54e-06	15	7.81e-05
			CCQ89521.1	Unigene13033_merge	Nitrospina gracilis 3/211	3	1.36e-05	8	4.16e-05
	urease	3.5.1.5	NP_285642.1	Unigene14417_merge	Deinococcus radiodurans R1	0	0	6	3.12e-05
			WP_011365545.1	Unigene15180_merge	Synechococcus sp. CC9605	0	0	14	7.29e-05
			WP_048347547.1	Unigene23508_merge	Synechococcus sp. WH 8020	1	4.54e-06	7	3.64e-05
	glutamine synthase	6.3.1.2	WP_075506525.1	Unigene14186_merge	Candidatus Pelagibacter ubique	0	0	7	3.64e-05
			OIO16200.1	CL2437.Contig2_merge	Helicobacteraceae bacterium CG1_02_36_14	0	0	9	4.68e-05
			PDH60187.1	Unigene11314_merge	Rhodobacteraceae bacterium MED-G08	0	0	2	1.04e-05
			WP_038555273.1	CL2391.Contig1_merge	Synechococcus sp. KORDI-52	4	1.82e-05	99	0.000515
			WP_040725926.1	Unigene9251_merge	Thiomicrorhabdus sp. Kp2	0	0	2	1.04e-05
				Unigene9252_merge	Thiomicrorhabdus sp. Kp2	0	0	10	5.2e-05
			AAY45658.1	Unigene19904_merge	Synechococcus sp. WH 8104	0	0	15	7.81e-05
			AGQ19770.1	Unigene10483_merge	Candidatus Actinomarina minuta	1	4.54e-06	5	2.6e-05
			CDL72861.1	CL2437.Contig1_merge	uncultured Epsilonproteobacteria bacterium	4	1.82e-05	50	0.00026
				Unigene11459_merge	uncultured Epsilonproteobacteria bacterium	2	9.08e-06	4	2.08e-05
				CL355.Contig4_merge	uncultured Epsilonproteobacteria bacterium	89	0.000404	406	0.002113
				CL2026.Contig2_merge	uncultured Epsilonproteobacteria bacterium	7	3.18e-05	25	0.00013
			CDL72862.1	CL355.Contig1_merge	uncultured Epsilonproteobacteria bacterium	52	0.000236	55	0.000286
			EEZ79634.1	Unigene6652_merge	uncultured SUP05 cluster bacterium	0	0	14	7.29e-05
				Unigene16738_merge	uncultured SUP05 cluster bacterium	0	0	6	3.12e-05
			EJP73927.1	Unigene8789_merge	SAR86 cluster bacterium SAR86B	0	0	8	4.16e-05
				Unigene7314_merge	SAR86 cluster bacterium SAR86B	0	0	7	3.64e-05
				Unigene13819_merge	SAR86 cluster bacterium SAR86B	4	1.82e-05	7	3.64e-05
			EKO35932.1	Unigene24518_merge	SAR86 cluster bacterium SAR86E	0	0	3	1.56e-05
			GAK16234.1	CL751.Contig2_merge	Vibrio sp. JCM 19053	8	3.63e-05	0	0
			KIM07808.1	CL2889.Contig2_merge	Sulfurovum sp. PC08-66	0	0	5	2.6e-05
				Unigene19991_merge	Sulfurovum sp. PC08-66	0	0	15	7.81e-05
			KZZ45856.1	Unigene13842_merge	Thalassolituus sp. HI0120	0	0	8	4.16e-05
			OUR71834.1	Unigene15567_merge	Arcobacter sp. 31_11_sub10_T18	0	0	1	5.2e-06
			OUV36104.1	CL1620.Contig1_merge	Alteromonadaceae bacterium TMED101	10	4.54e-05	15	7.81e-05
			OUW31823.1	Unigene29346_merge	Candidatus Puniceispirillum sp. TMED176	2	9.08e-06	0	0
			OYZ63657.1	Unigene8536_merge	Sulfuricurvum sp. 24-42-5	4	1.82e-05	13	6.77e-05
			PCK01292.1	Unigene10897_merge	Alteromonadaceae bacterium	1	4.54e-06	2	1.04e-05
			PDH17759.1	Unigene17516_merge	Pelagibacterales bacterium MED-G44	0	0	10	5.2e-05
			PHR15512.1	CL2889.Contig5_merge	Sulfurimonas sp.	9	4.09e-05	28	0.000146
			PHR58465.1	CL2889.Contig3_merge	Arcobacter sp.	1	4.54e-06	5	2.6e-05
			PHS34480.1	Unigene27321_merge	Sulfurovum sp.	5	2.27e-05	4	2.08e-05
			PHS42272.1	Unigene14297_merge	Sulfurovum sp.	0	0	4	2.08e-05
			PHS59055.1	Unigene19193_merge	Sulfurimonas sp.	0	0	7	3.64e-05
				CL355.Contig3_merge	Sulfurimonas sp.	4	1.82e-05	2	1.04e-05
				Unigene22948_merge	Sulfurimonas sp.	0	0	3	1.56e-05
				Unigene5448_merge	Sulfurimonas sp.	0	0	0	0
				Unigene225_merge	Sulfurimonas sp.	5	2.27e-05	6	3.12e-05
				CL2889.Contig1_merge	Sulfurimonas sp.	10	4.54e-05	68	0.000354
			PPR54957.1	Unigene8038_merge	Alphaproteobacteria bacterium MarineAlpha5_Bin2	0	0	5	2.6e-05
			PQM60141.1	Unigene10191_merge	Rhodobacteraceae bacterium	2	9.08e-06	8	4.16e-05
			WP_002709641.1	Unigene7539_merge	Thiothrix nivea	1	4.54e-06	8	4.16e-05
				Unigene24424_merge	Thiothrix nivea	1	4.54e-06	4	2.08e-05
			WP_008336778.1	CL2437.Contig3_merge	Sulfurimonas gotlandica	0	0	3	1.56e-05
				CL2026.Contig1_merge	Sulfurimonas gotlandica	0	0	8	4.16e-05
			WP_011364181.1	Unigene6658_merge	Synechococcus sp. CC9605	6	2.72e-05	52	0.000271
			WP_011980046.1	Unigene5449_merge	Sulfurovum sp. NBC37-1	3	1.36e-05	2	1.04e-05
			WP_013136424.1	Unigene25415_merge	Arcobacter nitrofigilis	0	0	4	2.08e-05
			WP_013327675.1	Unigene13206_merge	Sulfurimonas autotrophica	0	0	0	0
				CL2889.Contig4_merge	Sulfurimonas autotrophica	6	2.72e-05	12	6.25e-05
			WP_019556855.1	Unigene13851_merge	Thiomicrorhabdus arctica	0	0	8	4.16e-05
			WP_022950346.1	Unigene9168_merge	Leucothrix mucor	2	9.08e-06	19	9.89e-05
				CL1620.Contig2_merge	Leucothrix mucor	6	2.72e-05	33	0.000172
				CL918.Contig2_merge	Leucothrix mucor	3	1.36e-05	19	9.89e-05
			WP_024791905.1	Unigene38_merge	Lebetimonas sp. JS138	2029	0.009215	954	0.004965
			WP_046551638.1	CL355.Contig2_merge	Sulfurovum lithotrophicum	19	8.63e-05	82	0.000427
			WP_053396244.1	CL751.Contig1_merge	Vibrio nereis	10	4.54e-05	0	0
			WP_053974317.1	Unigene21700_merge	Polaribacter dokdonensis	0	0	9	4.68e-05
			WP_054552391.1	Unigene30188_merge	Pseudoalteromonas lipolytica	49	0.000223	4	2.08e-05
			WP_058583999.1	Unigene26949_merge	Pseudoalteromonas sp. XI10	40	0.000182	12	6.25e-05
			WP_061095799.1	Unigene28895_merge	Alteromonas macleodii	19	8.63e-05	3	1.56e-05
			WP_062568222.1	Unigene26942_merge	Pseudoalteromonas arabiensis	56	0.000254	9	4.68e-05
				Unigene28856_merge	Pseudoalteromonas arabiensis	8	3.63e-05	0	0
			WP_066906366.1	CL2391.Contig2_merge	Synechococcus	0	0	5	2.6e-05
			WP_067329893.1	Unigene12910_merge	Sulfurovum riftiae	0	0	5	2.6e-05
			WP_075536430.1	Unigene13468_merge	Candidatus Pelagibacter ubique	0	0	7	3.64e-05
			WP_085248481.1	CL918.Contig1_merge	Gilliamella mensalis	4	1.82e-05	6	3.12e-05
Sulfur Cycle	sulfite reductase (NADPH)	1.8.1.2	ACF09446.1	Unigene14180_merge	uncultured marine group II euryarchaeote SAT1000-15-B12	0	0	2	1.04e-05
			AIF01773.1	Unigene14179_merge	uncultured marine group II/III euryarchaeote KM3_14_E02	0	0	7	3.64e-05
			OHD95768.1	Unigene21526_merge	Sulfurimonas sp. GWF2_37_8	0	0	7	3.64e-05
			DAB39879.1	Unigene20205_merge	Sulfurovum sp. UBA12169	2	9.08e-06	26	0.000135
			OQR40684.1	Unigene19330_merge	Arcobacter cryaerophilus	0	0	0	0
			OQX73703.1	Unigene2615_merge	Campylobacteraceae bacterium 4484_4	25	0.000114	23	0.00012
				CL2734.Contig2_merge	Campylobacteraceae bacterium 4484_4	26	0.000118	113	0.000588
				Unigene28587_merge	Campylobacteraceae bacterium 4484_4	12	5.45e-05	6	3.12e-05
				Unigene28396_merge	Campylobacteraceae bacterium 4484_4	3	1.36e-05	3	1.56e-05
			OQX77643.1	Unigene642_merge	Epsilonproteobacteria bacterium 4484_65	31	0.000141	393	0.002045
			PHQ56991.1	Unigene6339_merge	Sulfurimonas sp.	0	0	2	1.04e-05
				CL2892.Contig1_merge	Sulfurimonas sp.	4	1.82e-05	0	0
				Unigene5759_merge	Sulfurimonas sp.	0	0	3	1.56e-05
			PHR54688.1	Unigene19541_merge	Arcobacter sp.	12	5.45e-05	156	0.000812
			PHQ56991.1	CL2734.Contig1_merge	Sulfurimonas sp.	3	1.36e-05	15	7.81e-05
				Unigene24659_merge	Sulfurimonas sp.	0	0	4	2.08e-05
			PHR11853.1	Unigene13343_merge	Sulfurimonas sp.	0	0	10	5.2e-05
				CL885.Contig2_merge	Sulfurimonas sp.	0	0	7	3.64e-05
				Unigene20134_merge	Sulfurimonas sp.	0	0	40	0.000208
				CL886.Contig7_merge	Sulfurimonas sp.	17	7.72e-05	18	9.37e-05
				CL885.Contig4_merge	Sulfurimonas sp.	0	0	8	4.16e-05
				Unigene5273_merge	Sulfurimonas sp.	0	0	9	4.68e-05
			PHR55761.1	Unigene13322_merge	Arcobacter sp.	1	4.54e-06	7	3.64e-05
				Unigene20508_merge	Arcobacter sp.	4	1.82e-05	15	7.81e-05
			WP_005978564.1	Unigene30641_merge	Ruegeria lacuscaerulensis	7	3.18e-05	0	0
				CL2921.Contig1_merge	Ruegeria lacuscaerulensis	10	4.54e-05	30	0.000156
			WP_007601691.1	Unigene18131_merge	Bradyrhizobium sp. WSM1253	2	9.08e-06	14	7.29e-05
			WP_008242939.1	Unigene4239_merge	Sulfurovum sp. AR	59	0.000268	255	0.001327
			WP_008245957.1	CL886.Contig9_merge	Sulfurovum sp. AR	80	0.000363	258	0.001343
				CL886.Contig6_merge	Sulfurovum sp. AR	140	0.000636	1160	0.006037
				CL886.Contig5_merge	Sulfurovum sp. AR	46	0.000209	356	0.001853
				Unigene3373_merge	Sulfurovum sp. AR	18	8.17e-05	16	8.33e-05
				CL886.Contig8_merge	Sulfurovum sp. AR	5	2.27e-05	23	0.00012
				Unigene8454_merge	Sulfurovum sp. AR	0	0	7	3.64e-05
				CL886.Contig4_merge	Sulfurovum sp. AR	3	1.36e-05	6	3.12e-05
				Unigene15252_merge	Sulfurovum sp. AR	0	0	7	3.64e-05
			WP_013326827.1	Unigene23547_merge	Sulfurimonas autotrophica	0	0	5	2.6e-05
			WP_013327891.1	CL885.Contig1_merge	Sulfurimonas autotrophica	4	1.82e-05	7	3.64e-05
				Unigene3094_merge	Sulfurimonas autotrophica	28	0.000127	39	0.000203
				CL2892.Contig2_merge	Sulfurimonas autotrophica	6	2.72e-05	60	0.000312
			WP_014473400.1	CL2264.Contig2_merge	Arcobacter sp. L	233	0.001058	204	0.001062
			WP_048600007.1	CL2921.Contig2_merge	Nereida ignava	0	0	2	1.04e-05
			WP_066181325.1	CL1792.Contig1_merge	Arcobacter thereius	17	7.72e-05	81	0.000422
			WP_076088222.1	Unigene14614_merge	Arcobacter sp. LPB0137	0	0	6	3.12e-05
			WP_099310944.1	CL1792.Contig2_merge	Arcobacter marinus	1	4.54e-06	7	3.64e-05
			WP_099334963.1	CL319.Contig2_merge	Arcobacter canalis	0	0	11	5.72e-05
	Sulfite reductase [ferredoxin]	1.8.7.1	AHF63815.1	Unigene6489_merge	Synechococcus sp. WH 8109	17	7.72e-05	246	0.00128
			SBT21983.1	Unigene10629_merge	Marinomonas gallaica	0	0	2	1.04e-05
	adenylylsulfate reductase	1.8.99.2	KPJ74603.1	Unigene9350_merge	Deltaproteobacteria bacterium SG8_13	1	4.54e-06	4	2.08e-05
				Unigene13432_merge	Deltaproteobacteria bacterium SG8_13	0	0	9	4.68e-05
			PCJ88551.1	Unigene7804_merge	Thiotrichaceae bacterium	0	0	3	1.56e-05
				Unigene24280_merge	Thiotrichaceae bacterium	0	0	4	2.08e-05
			WP_023648676.1	Unigene6332_merge	Candidatus Pelagibacter ubique	0	0	5	2.6e-05
			WP_075504382.1	Unigene15886_merge	Candidatus Pelagibacter ubique	0	0	13	6.77e-05
			ABV80008.1	CL2373.Contig2_merge	Thiocystis gelatinosa	0	0	5	2.6e-05
			ABV80025.1	CL1506.Contig3_merge	Thiothrix nivea DSM 5205	0	0	6	3.12e-05
			ABV80046.1	Unigene21019_merge	sulfur-oxidizing bacterium str. manganese crust	3	1.36e-05	3	1.56e-05
			ABV80090.1	CL2970.Contig3_merge	sulfur-oxidizing bacterium AII2	3	1.36e-05	2	1.04e-05
				CL2809.Contig2_merge	sulfur-oxidizing bacterium AII2	0	0	6	3.12e-05
			ABV80096.1	Unigene6928_merge	endosymbiont of Inanidrilus exumae	0	0	6	3.12e-05
				CL863.Contig1_merge	endosymbiont of Inanidrilus exumae	0	0	7	3.64e-05
			ABV80097.1	Unigene17779_merge	endosymbiont of Inanidrilus exumae	1	4.54e-06	10	5.2e-05
			AFV48082.1	Unigene16020_merge	uncultured bacterium	0	0	3	1.56e-05
			AOD75389.1	CL1506.Contig1_merge	uncultured bacterium	7	3.18e-05	207	0.001077
			ODB99095.1	CL1779.Contig3_merge	Candidatus Thiodiazotropha endoloripes	1	4.54e-06	7	3.64e-05
				CL1779.Contig2_merge	Candidatus Thiodiazotropha endoloripes	1	4.54e-06	3	1.56e-05
				CL1223.Contig2_merge	Candidatus Thiodiazotropha endoloripes	3	1.36e-05	6	3.12e-05
				CL1223.Contig1_merge	Candidatus Thiodiazotropha endoloripes	1	4.54e-06	7	3.64e-05
				Unigene18915_merge	Candidatus Thiodiazotropha endoloripes	1	4.54e-06	19	9.89e-05
			OHE58830.1	CL1779.Contig1_merge	Thiobacillus sp. GWE1_62_9	0	0	7	3.64e-05
			OSM05385.1	CL2814.Contig1_merge	Magnetofaba australis IT-1	0	0	5	2.6e-05
			OUT51461.1	CL2809.Contig1_merge	Rhodospirillaceae bacterium TMED8	0	0	3	1.56e-05
			OUW02258.1	Unigene26395_merge	Proteobacteria bacterium TMED154	0	0	2	1.04e-05
			OUW60314.1	Unigene17069_merge	Candidatus Pelagibacter sp. TMED203	0	0	3	1.56e-05
			OUX22401.1	Unigene14419_merge	Candidatus Pelagibacter sp. TMED253	0	0	13	6.77e-05
			OZA28348.1	CL1506.Contig2_merge	Hydrogenophilales bacterium 17-64-11	0	0	3	1.56e-05
			PUB80067.1	Unigene20267_merge	gamma proteobacterium symbiont of Ctena orbiculata	0	0	14	7.29e-05
			WP_007040792.1	Unigene9273_merge	Thiorhodococcus drewsii	0	0	8	4.16e-05
			WP_009147389.1	CL2814.Contig2_merge	Thiorhodovibrio sp. 970	0	0	3	1.56e-05
			WP_012636937.1	CL2970.Contig1_merge	Thioalkalivibrio sulfidiphilus	0	0	3	1.56e-05
			WP_018233553.1	Unigene17763_merge	Thioalkalivibrio thiocyanodenitrificans	0	0	6	3.12e-05
			WP_023853968.1	Unigene16888_merge	Candidatus Pelagibacter ubique	1	4.54e-06	7	3.64e-05
			WP_058557029.1	CL2967.Contig2_merge	Thiohalocapsa sp. ML1	0	0	12	6.25e-05
			WP_068993137.1	CL863.Contig2_merge	Candidatus Thiodiazotropha endoloripes	2	9.08e-06	24	0.000125
			WP_078476206.1	Unigene17762_merge	Solemya pervernicosa gill symbiont	1	4.54e-06	13	6.77e-05
			WP_078482415.1	CL2373.Contig1_merge	Solemya velesiana gill symbiont	3	1.36e-05	48	0.00025
			WP_093028106.1	CL2970.Contig2_merge	Thiocapsa roseopersicina	3	1.36e-05	23	0.00012
			WP_096366182.1	CL2967.Contig1_merge	Thiohalobacter thiocyanaticus	0	0	7	3.64e-05
	dissimilatory sulfite reductase	1.8.99.5	AII26365.1	Unigene2697_merge	Bathymodiolus brevior thioautotrophic gill symbiont	4	1.82e-05	8	4.16e-05
			WP_043108400.1	Unigene27422_merge	endosymbiont of unidentified scaly snail isolate Monju	4	1.82e-05	3	1.56e-05
			ABX82393.1	Unigene18223_merge	uncultured bacterium	0	0	3	1.56e-05
			ABX82419.1	Unigene25714_merge	uncultured marine bacterium	0	0	3	1.56e-05
			ABX82433.1	Unigene17631_merge	Thiothrix nivea DSM 5205	3	1.36e-05	10	5.2e-05
			ABX82434.1	CL70.Contig22_merge	Thiothrix nivea DSM 5205	0	0	15	7.81e-05
				CL70.Contig2_merge	Thiothrix nivea DSM 5205	36	0.000163	78	0.000406
				CL70.Contig16_merge	Thiothrix nivea DSM 5205	1	4.54e-06	4	2.08e-05
			ACI42954.1	CL70.Contig15_merge	Candidatus Thiobios zoothamnicoli	0	0	8	4.16e-05
			AFA54957.1	Unigene11019_merge	uncultured marine bacterium	0	0	5	2.6e-05
			AFI78392.1	Unigene9616_merge	uncultured bacterium ws101A12	0	0	2	1.04e-05
			AFI78417.1	Unigene17379_merge	uncultured bacterium ws020C1	0	0	8	4.16e-05
				CL103.Contig2_merge	uncultured bacterium ws020C1	0	0	7	3.64e-05
				CL103.Contig1_merge	uncultured bacterium ws020C1	0	0	2	1.04e-05
			AFI78418.1	Unigene18000_merge	uncultured bacterium ws020C1	0	0	0	0
			AFI78449.1	Unigene24425_merge	uncultured bacterium ws138B4	0	0	4	2.08e-05
			AFI78527.1	Unigene15617_merge	uncultured bacterium ws172H5	2	9.08e-06	4	2.08e-05
			AFI78582.1	Unigene25883_merge	uncultured bacterium ws643C1	2	9.08e-06	4	2.08e-05
			AFI78608.1	Unigene31736_merge	uncultured bacterium ws643C1	4	1.82e-05	0	0
			AHW46446.1	Unigene28124_merge	Thiocapsa roseopersicina	3	1.36e-05	0	0
			AII26364.1	Unigene10147_merge	Bathymodiolus aff. thermophilus thioautotrophic gill symbiont	0	0	4	2.08e-05
			AII26370.1	CL70.Contig8_merge	Bathymodiolus aff. brevior thioautotrophic gill symbiont	1	4.54e-06	6	3.12e-05
			AVR51227.1	CL70.Contig17_merge	uncultured sulfur-oxidizing bacterium	1	4.54e-06	9	4.68e-05
			BAJ17549.1	CL70.Contig25_merge	Thiocapsa marina 5811	0	0	2	1.04e-05
			CAR92253.1	Unigene15344_merge	uncultured marine bacterium	0	0	10	5.2e-05
				CL70.Contig19_merge	uncultured marine bacterium	0	0	12	6.25e-05
			CAR92272.1	Unigene20814_merge	uncultured marine bacterium	1	4.54e-06	11	5.72e-05
			CAR92273.1	Unigene15415_merge	uncultured marine bacterium	0	0	12	6.25e-05
			OQW98042.1	CL70.Contig23_merge	Thiothrix lacustris	0	0	7	3.64e-05
				CL70.Contig12_merge	Thiothrix lacustris	0	0	5	2.6e-05
			WP_002710145.1	Unigene17237_merge	Thiothrix nivea	0	0	10	5.2e-05
				CL70.Contig7_merge	Thiothrix nivea	37	0.000168	80	0.000416
				CL70.Contig5_merge	Thiothrix nivea	337	0.001531	1044	0.005433
				CL70.Contig20_merge	Thiothrix nivea	2	9.08e-06	20	0.000104
				CL70.Contig11_merge	Thiothrix nivea	25	0.000114	44	0.000229
				CL70.Contig10_merge	Thiothrix nivea	2	9.08e-06	11	5.72e-05
				CL70.Contig9_merge	Thiothrix nivea	0	0	2	1.04e-05
				CL70.Contig4_merge	Thiothrix nivea	25	0.000114	45	0.000234
			WP_015279168.1	Unigene10487_merge	Thioflavicoccus mobilis	0	0	6	3.12e-05
			WP_020397046.1	CL70.Contig18_merge	Thiothrix disciformis	0	0	0	0
			WP_020560447.1	CL70.Contig13_merge	Thiothrix flexilis	3	1.36e-05	8	4.16e-05
			WP_028490357.1	CL70.Contig28_merge	Thiothrix lacustris	1	4.54e-06	5	2.6e-05
			WP_053951024.1	Unigene5847_merge	Candidatus Thioglobus autotrophicus	1	4.54e-06	6	3.12e-05
			WP_066045264.1	Unigene3218_merge	Bathymodiolus septemdierum thioautotrophic gill symbiont	26	0.000118	116	0.000604
			WP_071564622.1	Unigene18535_merge	Bathymodiolus thermophilus thioautotrophic gill symbiont	4	1.82e-05	15	7.81e-05
			WP_078923063.1	Unigene1448_merge	Thiothrix eikelboomii	22	9.99e-05	33	0.000172
			WP_078923064.1	CL70.Contig3_merge	Thiothrix eikelboomii	15	6.81e-05	6	3.12e-05
				CL70.Contig14_merge	Thiothrix eikelboomii	0	0	9	4.68e-05
			WP_093069485.1	Unigene17236_merge	Thiothrix caldifontis	0	0	9	4.68e-05
	cysteine synthase	2.5.1.47	KIM04127.1	Unigene17590_merge	Sulfurovum sp. FS06-10	3	1.36e-05	21	0.000109
				CL689.Contig3_merge	Sulfurovum sp. FS06-10	2	9.08e-06	25	0.00013
				CL689.Contig2_merge	Sulfurovum sp. FS06-10	16	7.27e-05	67	0.000349
				CL689.Contig1_merge	Sulfurovum sp. FS06-10	0	0	1	5.2e-06
			OHD87623.1	Unigene21372_merge	Sulfuricurvum sp. RIFCSPLOWO2_02_43_6	0	0	9	4.68e-05
			OHD93134.1	Unigene9525_merge	Sulfurimonas sp. GWF2_37_8	0	0	3	1.56e-05
			PDH56792.1	Unigene16612_merge	SAR116 cluster bacterium MED-G06	0	0	7	3.64e-05
			PHR59524.1	Unigene13781_merge	Arcobacter sp.	2	9.08e-06	16	8.33e-05
				Unigene13920_merge	Arcobacter sp.	0	0	13	6.77e-05
			WP_006850945.1	Unigene20143_merge	Synechococcus sp. WH 8109	11	5e-05	363	0.001889
			WP_008885972.1	Unigene11542_merge	Citreicella sp. SE45	0	0	5	2.6e-05
			WP_023854071.1	Unigene13587_merge	Candidatus Pelagibacter ubique	0	0	10	5.2e-05
			WP_072090466.1	Unigene12135_merge	Candidatus Pelagibacter ubique	0	0	9	4.68e-05
			WP_074989864.1	Unigene28876_merge	Pseudoalteromonas haloplanktis ANT/505	6	2.72e-05	1	5.2e-06
			WP_075487670.1	Unigene19898_merge	Prochlorococcus marinus	9	4.09e-05	138	0.000718
			WP_075505878.1	Unigene18339_merge	Candidatus Pelagibacter ubique	1	4.54e-06	14	7.29e-05
				Unigene17473_merge	Candidatus Pelagibacter ubique	0	0	11	5.72e-05
	sulfate adenylyltransferase	2.7.7.4	AFV98031.1	Unigene26336_merge	uncultured Sulfuricurvum sp. RIFRC-1	0	0	5	2.6e-05
			CDL72789.1	CL2138.Contig2_merge	uncultured Epsilonproteobacteria bacterium	0	0	9	4.68e-05
				Unigene5468_merge	uncultured Epsilonproteobacteria bacterium	1	4.54e-06	4	2.08e-05
			CDL72802.1	Unigene13728_merge	uncultured gamma proteobacterium	0	0	2	1.04e-05
			KIM05893.1	Unigene7903_merge	Sulfurovum sp. FS06-10	0	0	4	2.08e-05
				CL2138.Contig1_merge	Sulfurovum sp. FS06-10	17	7.72e-05	66	0.000343
			OUR66594.1	CL186.Contig17_merge	Cycloclasticus sp. 46_83_sub15_T18	22	9.99e-05	43	0.000224
			OUW12898.1	Unigene17325_merge	Cellvibrionales bacterium TMED157	4	1.82e-05	14	7.29e-05
				Unigene14667_merge	Cellvibrionales bacterium TMED157	0	0	5	2.6e-05
			PCH83002.1	CL186.Contig4_merge	Piscirickettsiaceae bacterium	9	4.09e-05	15	7.81e-05
			PHS36186.1	Unigene10811_merge	Sulfurovum sp.	0	0	3	1.56e-05
			PIP09279.1	Unigene9426_merge	Sulfurimonas sp. CG23_combo_of_CG06-09_8_20_14_all_36_33	4	1.82e-05	2	1.04e-05
			WP_006851240.1	Unigene6215_merge	Synechococcus sp. WH 8109	0	0	45	0.000234
			WP_008245232.1	CL2138.Contig3_merge	Sulfurovum sp. AR	0	0	6	3.12e-05
			WP_012083482.1	Unigene12169_merge	Sulfurovum sp. NBC37-1	0	0	2	1.04e-05
				Unigene11908_merge	Sulfurovum sp. NBC37-1	0	0	5	2.6e-05
			WP_013326067.1	Unigene23769_merge	Sulfurimonas autotrophica	0	0	8	4.16e-05
			WP_029406887.1	CL186.Contig5_merge	Thiomicrorhabdus sp. Milos-T2	24	0.000109	10	5.2e-05
				CL186.Contig3_merge	Thiomicrorhabdus sp. Milos-T2	144	0.000654	93	0.000484
				CL186.Contig2_merge	Thiomicrorhabdus sp. Milos-T2	18	8.17e-05	13	6.77e-05
			WP_029406888.1	CL186.Contig16_merge	Thiomicrorhabdus sp. Milos-T2	19	8.63e-05	19	9.89e-05
				CL186.Contig15_merge	Thiomicrorhabdus sp. Milos-T2	0	0	0	0
				CL186.Contig13_merge	Thiomicrorhabdus sp. Milos-T2	12	5.45e-05	33	0.000172
				CL186.Contig12_merge	Thiomicrorhabdus sp. Milos-T2	0	0	0	0
				CL186.Contig10_merge	Thiomicrorhabdus sp. Milos-T2	299	0.001358	337	0.001754
				CL186.Contig1_merge	Thiomicrorhabdus sp. Milos-T2	132	0.000599	29	0.000151
				Unigene417_merge	Thiomicrorhabdus sp. Milos-T2	57	0.000259	24	0.000125
				Unigene30189_merge	Thiomicrorhabdus sp. Milos-T2	14	6.36e-05	4	2.08e-05
				Unigene2619_merge	Thiomicrorhabdus sp. Milos-T2	11	5e-05	9	4.68e-05
				CL186.Contig8_merge	Thiomicrorhabdus sp. Milos-T2	6	2.72e-05	3	1.56e-05
				CL186.Contig7_merge	Thiomicrorhabdus sp. Milos-T2	24	0.000109	16	8.33e-05
				CL186.Contig6_merge	Thiomicrorhabdus sp. Milos-T2	0	0	0	0
			WP_032553302.1	Unigene28270_merge	Vibrio fortis	8	3.63e-05	0	0
			WP_049585842.1	Unigene28816_merge	Alteromonas macleodii	3	1.36e-05	0	0
			WP_078463046.1	Unigene15017_merge	Solemya velum gill symbiont	0	0	7	3.64e-05
			WP_096259313.1	Unigene11645_merge	Lebetimonas natsushimae	1	4.54e-06	2	1.04e-05
			WP_096361455.1	Unigene13727_merge	Sulfuricaulis limicola	1	4.54e-06	15	7.81e-05
	flavocytochrome c/sulfide dehydrogenase (FccAB)	FccAB	KMW60697.1	Unigene12449_merge	Candidatus Rhodobacter lobularis	2	9.08e-06	8	4.16e-05
			ACX30468.1	Unigene23925_merge	uncultured SUP05 cluster bacterium	0	0	3	1.56e-05
			OAD23314.1	Unigene25177_merge	Candidatus Thiomargarita nelsonii	0	0	3	1.56e-05
				Unigene23572_merge	Candidatus Thiomargarita nelsonii	1	4.54e-06	6	3.12e-05
			OYZ03758.1	Unigene17683_merge	Thiotrichales bacterium 16-46-22	18	8.17e-05	132	0.000687
			WP_002709472.1	Unigene12648_merge	Thiothrix nivea	0	0	8	4.16e-05
			WP_005978559.1	CL1134.Contig2_merge	Ruegeria lacuscaerulensis	12	5.45e-05	118	0.000614
			WP_007474738.1	Unigene15130_merge	Caminibacter mediatlanticus	7	3.18e-05	19	9.89e-05
				Unigene15005_merge	Caminibacter mediatlanticus	3	1.36e-05	10	5.2e-05
			WP_011046749.1	Unigene6833_merge	Ruegeria pomeroyi	2	9.08e-06	8	4.16e-05
				CL813.Contig2_merge	Ruegeria pomeroyi	0	0	4	2.08e-05
				CL813.Contig1_merge	Ruegeria pomeroyi	0	0	3	1.56e-05
			WP_028486975.1	CL1809.Contig2_merge	Thiomicrorhabdus chilensis	212	0.000963	765	0.003981
				CL1809.Contig1_merge	Thiomicrorhabdus chilensis	2	9.08e-06	0	0
			WP_072680658.1	Unigene8225_merge	Arcobacter sp. LA11	0	0	7	3.64e-05
				Unigene13421_merge	Arcobacter sp. LA11	0	0	12	6.25e-05
				CL1811.Contig2_merge	Arcobacter sp. LA11	0	0	6	3.12e-05
				CL1811.Contig1_merge	Arcobacter sp. LA11	0	0	56	0.000291
	sulfur-oxidizing protein SoxA	SoxA	PIF03945.1	CL560.Contig1_merge	Arcobacter sp.	0	0	5	2.6e-05
			EEZ80660.1	Unigene24836_merge	uncultured SUP05 cluster bacterium	0	0	6	3.12e-05
			WP_010645935.1	Unigene19378_merge	endosymbiont of Bathymodiolus sp.	6	2.72e-05	158	0.000822
			WP_013326799.1	Unigene25690_merge	Sulfurimonas autotrophica	0	0	2	1.04e-05
				Unigene17375_merge	Sulfurimonas autotrophica	5	2.27e-05	11	5.72e-05
				Unigene12128_merge	Sulfurimonas autotrophica	0	0	6	3.12e-05
			WP_013553332.1	Unigene3247_merge	Nitratifractor salsuginis	62	0.000282	131	0.000682
			WP_021286688.1	Unigene24427_merge	Sulfurimonas hongkongensis	1	4.54e-06	3	1.56e-05
			WP_022950496.1	Unigene2040_merge	Leucothrix mucor	5	2.27e-05	6	3.12e-05
				CL1292.Contig1_merge	Leucothrix mucor	0	0	4	2.08e-05
			WP_028487016.1	Unigene1802_merge	Thiomicrorhabdus chilensis	5	2.27e-05	22	0.000114
				Unigene1775_merge	Thiomicrorhabdus chilensis	12	5.45e-05	101	0.000526
			WP_029939889.1	Unigene20295_merge	Hydrogenovibrio sp. MA2-6	2	9.08e-06	34	0.000177
			WP_038137216.1	Unigene6902_merge	Hydrogenovibrio sp. Milos-T1	0	0	7	3.64e-05
			WP_076088211.1	CL560.Contig2_merge	Arcobacter sp. LPB0137	79	0.000359	849	0.004418
				Unigene21851_merge	Arcobacter sp. LPB0137	0	0	6	3.12e-05
			WP_085794354.1	Unigene4213_merge	Tropicibacter litoreus	72	0.000327	606	0.003154
			WP_096365582.1	Unigene2581_merge	Thiohalobacter thiocyanaticus	9	4.09e-05	23	0.00012
	sulfur-oxidizing protein SoxB	soxB	PHR12872.1	Unigene1215_merge	Sulfurimonas sp.	3	1.36e-05	7	3.64e-05
			WP_008340308.1	Unigene19287_merge	Sulfurimonas gotlandica	0	0	5	2.6e-05
			WP_019556411.1	Unigene12133_merge	Thiomicrorhabdus arctica	2	9.08e-06	11	5.72e-05
				CL1944.Contig3_merge	Thiomicrorhabdus arctica	1	4.54e-06	22	0.000114
				CL1944.Contig2_merge	Thiomicrorhabdus arctica	1	4.54e-06	10	5.2e-05
			AFV92572.1	Unigene16762_merge	uncultured bacterium	1	4.54e-06	8	4.16e-05
			AGH15650.1	Unigene7226_merge	uncultured bacterium	1	4.54e-06	6	3.12e-05
			AGQ20522.1	Unigene26066_merge	uncultured bacterium	0	0	2	1.04e-05
			BAI99246.1	Unigene25896_merge	Oligobrachia mashikoi endosymbiont C	0	0	2	1.04e-05
			CBH30941.1	Unigene10660_merge	uncultured bacterium	0	0	1	5.2e-06
			EEZ80559.1	Unigene8958_merge	uncultured SUP05 cluster bacterium	0	0	8	4.16e-05
			PHR72277.1	Unigene20710_merge	Arcobacter sp.	0	0	9	4.68e-05
			PLY05330.1	CL1285.Contig2_merge	Arcobacter sp.	16	7.27e-05	74	0.000385
			PNV82988.1	Unigene28005_merge	Sulfurimonas sp.	5	2.27e-05	0	0
			WP_008245272.1	Unigene7890_merge	Sulfurovum sp. AR	0	0	3	1.56e-05
			WP_013326800.1	Unigene21866_merge	Sulfurimonas autotrophica	1	4.54e-06	10	5.2e-05
			WP_013553334.1	Unigene4691_merge	Nitratifractor salsuginis	26	0.000118	25	0.00013
				CL1200.Contig1_merge	Nitratifractor salsuginis	59	0.000268	90	0.000468
			WP_021286687.1	Unigene24056_merge	Sulfurimonas hongkongensis	0	0	3	1.56e-05
			WP_044418689.1	CL2771.Contig2_merge	Arcobacter anaerophilus	0	0	2	1.04e-05
				CL2771.Contig1_merge	Arcobacter anaerophilus	0	0	9	4.68e-05
			WP_046551516.1	Unigene22482_merge	Sulfurovum lithotrophicum	0	0	5	2.6e-05
			WP_066409884.1	Unigene373_merge	Arcobacter skirrowii	11	5e-05	15	7.81e-05
			WP_076088203.1	CL1200.Contig2_merge	Arcobacter sp. LPB0137	4	1.82e-05	46	0.000239
			WP_101839313.1	CL1944.Contig5_merge	Hydrogenovibrio sp. SC-1	0	0	4	2.08e-05
				CL1944.Contig4_merge	Hydrogenovibrio sp. SC-1	0	0	5	2.6e-05
			WP_106184618.1	Unigene22370_merge	Epsilonproteobacteria bacterium SCGC AD-311-E16	1	4.54e-06	6	3.12e-05
			WP_107846813.1	Unigene10200_merge	Litoreibacter ponti	1	4.54e-06	12	6.25e-05
	sulfur-oxidizing protein SoxCD	SoxC	PSL13195.1	CL1418.Contig1_merge	Marinobacterium halophilum	2	9.08e-06	5	2.6e-05
				Unigene20126_merge	Marinobacterium halophilum	4	1.82e-05	52	0.000271
				Unigene5521_merge	Marinobacterium halophilum	3	1.36e-05	0	0
		SoxCD	PIF03941.1	Unigene8646_merge	Arcobacter sp.	3	1.36e-05	16	8.33e-05
				Unigene16303_merge	Arcobacter sp.	0	0	9	4.68e-05
				CL1996.Contig1_merge	Arcobacter sp	134	0.000609	1711	0.008905
		SoxD	PLY11336.1	Unigene23816_merge	Arcobacter sp.	0	0	3	1.56e-05
			WP_014473401.1	CL2264.Contig1_merge	Arcobacter sp. L	37	0.000168	42	0.000219
			WP_066409881.1	CL319.Contig1_merge	Arcobacter skirrowii	36	0.000163	102	0.000531
			WP_105912803.1	CL885.Contig3_merge	Arcobacter cryaerophilus	35	0.000159	132	0.000687
			WP_105925196.1	Unigene4598_merge	Arcobacter sp. LMG 29976	24	0.000109	108	0.000562
			ABB40753.1	Unigene32353_merge	Thiomicrospira crunogena XCL-2	0	0	0	0
				Unigene30783_merge	Thiomicrospira crunogena XCL-2	6	2.72e-05	0	0
				CL1418.Contig3_merge	Thiomicrospira crunogena XCL-2	59	0.000268	122	0.000635
			CDL72776.1	Unigene25072_merge	uncultured Epsilonproteobacteria bacterium	0	0	4	2.08e-05
				Unigene23567_merge	uncultured Epsilonproteobacteria bacterium	0	0	3	1.56e-05
				Unigene15298_merge	uncultured Epsilonproteobacteria bacterium	4	1.82e-05	30	0.000156
				Unigene13704_merge	uncultured Epsilonproteobacteria bacterium	0	0	7	3.64e-05
			SEO06677.1	Unigene10553_merge	Maribius pelagius	1	4.54e-06	5	2.6e-05
			WP_008245954.1	Unigene7259_merge	Sulfurovum sp. AR	0	0	6	3.12e-05
				Unigene18324_merge	Sulfurovum sp. AR	0	0	5	2.6e-05
				Unigene18323_merge	Sulfurovum sp. AR	0	0	4	2.08e-05
				Unigene16950_merge	Sulfurovum sp. AR	0	0	25	0.00013
				Unigene12865_merge	Sulfurovum sp. AR	0	0	5	2.6e-05
	sulfur oxidation protein SoxX	SoxX	EEZ80663.1	Unigene20676_merge	uncultured SUP05 cluster bacterium	0	0	12	6.25e-05
			KPK55405.1	Unigene11953_merge	Gammaproteobacteria bacterium SG8_31	0	0	11	5.72e-05
			WP_002708589.1	Unigene26257_merge	Thiothrix nivea	0	0	4	2.08e-05
				Unigene20424_merge	Thiothrix nivea	0	0	18	9.37e-05
			WP_026744391.1	Unigene21736_merge	Leucothrix mucor	3	1.36e-05	8	4.16e-05
			WP_072680605.1	Unigene17556_merge	Arcobacter sp. LA11	1	4.54e-06	38	0.000198
			WP_101184895.1	Unigene20558_merge	Arcobacter halophilus	0	0	11	5.72e-05
	sulfur oxidation protein SoxY	SoxY	BAF71011.1	CL1996.Contig2_merge	Sulfurovum sp. NBC37-1	1	4.54e-06	32	0.000167
			OYY26947.1	Unigene23974_merge	Sulfurovum sp. 35-42-20	2	9.08e-06	8	4.16e-05
				CL886.Contig2_merge	Sulfurovum sp. 35-42-20	52	0.000236	492	0.002561
				CL2941.Contig2_merge	Sulfurovum sp. 35-42-20	0	0	31	0.000161
			PIV89517.1	Unigene23657_merge	Hydrogenophilales bacterium CG17_	0	0	7	3.64e-05
			WP_019555809.1	CL811.Contig3_merge	Thiomicrorhabdus arctica	3	1.36e-05	18	9.37e-05
			WP_093065343.1	Unigene1168_merge	Thiothrix caldifontis	39	0.000177	161	0.000838
			DAB39877.1	Unigene17374_merge	Sulfurovum sp. UBA12169	3	1.36e-05	35	0.000182
				Unigene9559_merge	Sulfurovum sp. UBA12169	1	4.54e-06	3	1.56e-05
			OQX57774.1	Unigene7582_merge	Helicobacteraceae bacterium 4484_230	0	0	5	2.6e-05
				Unigene6513_merge	Helicobacteraceae bacterium 4484_230	0	0	13	6.77e-05
				Unigene24923_merge	Helicobacteraceae bacterium 4484_230	2	9.08e-06	2	1.04e-05
				CL1711.Contig3_merge	Helicobacteraceae bacterium 4484_230	0	0	6	3.12e-05
				CL1711.Contig2_merge	Helicobacteraceae bacterium 4484_230	2	9.08e-06	3	1.56e-05
				CL1711.Contig1_merge	Helicobacteraceae bacterium 4484_230	0	0	7	3.64e-05
			OZB55894.1	Unigene25833_merge	Halothiobacillus sp. 14-56-357	2	9.08e-06	7	3.64e-05
			PHR11851.1	Unigene5418_merge	Sulfurimonas sp.	0	0	0	0
			PHR53904.1	Unigene8115_merge	Arcobacter sp.	1	4.54e-06	10	5.2e-05
			PHR54686.1	CL2210.Contig2_merge	Arcobacter sp.	16	7.27e-05	78	0.000406
				CL2210.Contig1_merge	Arcobacter sp.	1	4.54e-06	19	9.89e-05
			WP_008245958.1	Unigene24487_merge	Arcobacter sp.	0	0	4	2.08e-05
			WP_013553330.1	Unigene23503_merge	Nitratifractor salsuginis	0	0	7	3.64e-05
				Unigene18380_merge	Nitratifractor salsuginis	3	1.36e-05	50	0.00026
			WP_028485707.1	Unigene21910_merge	Thiomicrorhabdus chilensis	0	0	9	4.68e-05
			WP_028487014.1	CL811.Contig6_merge	Thiomicrorhabdus chilensis	5	2.27e-05	20	0.000104
				CL811.Contig5_merge	Thiomicrorhabdus chilensis	9	4.09e-05	3	1.56e-05
				CL811.Contig1_merge	Thiomicrorhabdus chilensis	36	0.000163	87	0.000453
			WP_039959664.1	Unigene3448_merge	endosymbiont of Riftia pachyptila	13	5.9e-05	18	9.37e-05
			WP_043108249.1	Unigene26413_merge	endosymbiont of unidentified scaly snail isolate Monju	0	0	2	1.04e-05
			WP_043540134.1	Unigene16771_merge	Salinarimonas rosea	2	9.08e-06	34	0.000177
			WP_053951769.1	CL2356.Contig2_merge	Candidatus Thioglobus autotrophicus	0	0	47	0.000245
				CL2356.Contig1_merge	Candidatus Thioglobus autotrophicus	3	1.36e-05	4	2.08e-05
			WP_067332630.1	Unigene13113_merge	Sulfurovum riftiae	0	0	5	2.6e-05
			WP_068585232.1	Unigene11377_merge	Thiomicrospira sp. WB1	2	9.08e-06	6	3.12e-05
	sulfur oxidation protein SoxZ	SoxZ	DAB39876.1	Unigene20133_merge	Sulfurovum sp. UBA12169	1	4.54e-06	49	0.000255
			ABB41198.1	Unigene8508_merge	Thiomicrospira crunogena XCL-2	5	2.27e-05	7	3.64e-05
				Unigene20559_merge	Thiomicrospira crunogena XCL-2	0	0	10	5.2e-05
				Unigene1931_merge	Thiomicrospira crunogena XCL-2	5	2.27e-05	31	0.000161
			PHR11850.1	Unigene16586_merge	Sulfurimonas sp.	4	1.82e-05	26	0.000135
			PHR54685.1	Unigene8491_merge	Arcobacter sp.	1	4.54e-06	22	0.000114
				Unigene16585_merge	Arcobacter sp.	3	1.36e-05	35	0.000182
				Unigene11326_merge	Arcobacter sp.	6	2.72e-05	39	0.000203
			PHS34705.1	CL886.Contig3_merge	Sulfurovum sp.	0	0	1	5.2e-06
			WP_013327894.1	Unigene20637_merge	Sulfurimonas autotrophica	1	4.54e-06	13	6.77e-05
			WP_028489652.1	Unigene20876_merge	Thiothrix lacustris	1	4.54e-06	10	5.2e-05
				CL461.Contig2_merge	Thiothrix lacustris	0	0	7	3.64e-05
				Unigene14885_merge	Thiothrix lacustris	0	0	11	5.72e-05
			WP_078118637.1	Unigene22211_merge	Chromatiaceae bacterium 2141T.STBD.0c.01a	1	4.54e-06	7	3.64e-05
				Unigene22134_merge	Chromatiaceae bacterium 2141T.STBD.0c.01a	2	9.08e-06	7	3.64e-05
			WP_078920804.1	Unigene19579_merge	Thiothrix eikelboomii	1	4.54e-06	13	6.77e-05
				Unigene22135_merge	Thiothrix eikelboomii	0	0	7	3.64e-05
CBB, Calvin-Benson-Bassham cycle; rTCA, reductive tricarboxylic acid cycle.
